# Supplementary material for: A Two-Stage Meta-Analysis Identifies Several New Loci for Parkinson's Disease
Source: PLoS Genet. 2011 Jun 30;7(6):e1002142. doi: 10.1371/journal.pgen.1002142 (PMC3128098; doi:10.1371/journal.pgen.1002142)
Supplement: Table S3 — Complete list of tested QTL associations (expression and methylation). (XLSX) [file pgen.1002142.s003.xlsx]

## Sheet: Appendix1.QTLs
SNP	Chromosome	BP	Probe	Allele1,Allele2	Frequency Allele1	RSQR from Mach	Effect Allele2	SE	Chi-Squared	P-value	FDR Adjusted P-value	Assay	Region
rs708723	1	204005889	ILMN_1813685	T,C	0.5464	0.9454	-0.106	0.02	27.8839	1.29e-07	3.74e-06	Expression	CRBLM
rs708723	1	204005889	ILMN_1680692	T,C	0.5464	0.9454	0.13	0.029	20.7321	5.28e-06	0.00011484	Expression	CRBLM
rs708723	1	204005889	ILMN_1826921	T,C	0.5464	0.9454	-0.044	0.024	3.2485	0.07149	0.348356	Expression	CRBLM
rs708723	1	204005889	ILMN_1696532	T,C	0.5464	0.9454	-0.034	0.02	2.9994	0.08329	0.348356	Expression	CRBLM
rs708723	1	204005889	ILMN_1779600	T,C	0.5464	0.9454	-0.039	0.024	2.6041	0.1066	0.371844	Expression	CRBLM
rs708723	1	204005889	ILMN_1656186	T,C	0.5464	0.9454	-0.023	0.015	2.4991	0.1139	0.371844	Expression	CRBLM
rs708723	1	204005889	ILMN_1784110	T,C	0.5464	0.9454	0.063	0.044	2.0984	0.1475	0.436603	Expression	CRBLM
rs708723	1	204005889	ILMN_1755910	T,C	0.5464	0.9454	-0.048	0.036	1.737	0.1875	0.436603	Expression	CRBLM
rs708723	1	204005889	ILMN_2362902	T,C	0.5464	0.9454	0.024	0.019	1.5643	0.211	0.458925	Expression	CRBLM
rs708723	1	204005889	ILMN_1712487	T,C	0.5464	0.9454	0.02	0.017	1.3866	0.239	0.486188	Expression	CRBLM
rs708723	1	204005889	ILMN_1759549	T,C	0.5464	0.9454	-0.03	0.026	1.3786	0.2403	0.486188	Expression	CRBLM
rs708723	1	204005889	ILMN_1659024	T,C	0.5464	0.9454	0.022	0.02	1.1527	0.283	0.547133	Expression	CRBLM
rs708723	1	204005889	ILMN_1869109	T,C	0.5464	0.9454	-0.012	0.012	0.9389	0.3325	0.615479	Expression	CRBLM
rs708723	1	204005889	ILMN_1718896	T,C	0.5464	0.9454	0.011	0.031	0.1193	0.7298	0.9048	Expression	CRBLM
rs708723	1	204005889	ILMN_1680692	T,C	0.5464	0.9454	0.155	0.03	27.2738	1.77e-07	1.5e-05	Expression	FCTX
rs708723	1	204005889	ILMN_1813685	T,C	0.5464	0.9454	-0.062	0.018	11.4491	0.0007153	0.0121601	Expression	FCTX
rs708723	1	204005889	ILMN_1779600	T,C	0.5464	0.9454	-0.055	0.022	6.2664	0.0123	0.116167	Expression	FCTX
rs708723	1	204005889	ILMN_2362902	T,C	0.5464	0.9454	-0.039	0.025	2.4791	0.1154	0.49381	Expression	FCTX
rs708723	1	204005889	ILMN_1712487	T,C	0.5464	0.9454	0.024	0.019	1.5121	0.2188	0.619933	Expression	FCTX
rs708723	1	204005889	ILMN_1696532	T,C	0.5464	0.9454	-0.019	0.021	0.8651	0.3523	0.769636	Expression	FCTX
rs708723	1	204005889	ILMN_1869109	T,C	0.5464	0.9454	0.013	0.014	0.7918	0.3736	0.769636	Expression	FCTX
rs708723	1	204005889	ILMN_1659024	T,C	0.5464	0.9454	0.02	0.023	0.7504	0.3863	0.769636	Expression	FCTX
rs708723	1	204005889	ILMN_1784110	T,C	0.5464	0.9454	0.041	0.048	0.7132	0.3984	0.769636	Expression	FCTX
rs708723	1	204005889	ILMN_1656186	T,C	0.5464	0.9454	0.01	0.018	0.3264	0.5678	0.952163	Expression	FCTX
rs708723	1	204005889	ILMN_1759549	T,C	0.5464	0.9454	-0.008	0.017	0.2515	0.616	0.964055	Expression	FCTX
rs708723	1	204005889	ILMN_1718896	T,C	0.5464	0.9454	-0.026	0.052	0.2406	0.6238	0.964055	Expression	FCTX
rs708723	1	204005889	cg14893161	T,C	0.5432	0.9662	-0.202	0.018	121.78	2.58e-28	6.42e-26	Methylation	CRBLM
rs708723	1	204005889	cg14159672	T,C	0.5432	0.9662	-0.246	0.023	116.908	3.01e-27	3.75e-25	Methylation	CRBLM
rs708723	1	204005889	cg02589695	T,C	0.5432	0.9662	-0.009	0.003	7.7101	0.005491	0.136726	Methylation	CRBLM
rs708723	1	204005889	cg05938725	T,C	0.5432	0.9662	0.002	0.001	5.1775	0.02288	0.406937	Methylation	CRBLM
rs708723	1	204005889	cg17860158	T,C	0.5432	0.9662	0.002	0.002	1.4819	0.2235	0.784992	Methylation	CRBLM
rs708723	1	204005889	cg19452316	T,C	0.5432	0.9662	0.001	0.001	1.3122	0.252	0.784992	Methylation	CRBLM
rs708723	1	204005889	cg16639185	T,C	0.5432	0.9662	-0.004	0.004	1.209	0.2715	0.784992	Methylation	CRBLM
rs708723	1	204005889	cg14514226	T,C	0.5432	0.9662	-0.001	0.001	1.0766	0.2995	0.784992	Methylation	CRBLM
rs708723	1	204005889	cg11560403	T,C	0.5432	0.9662	0.001	0.001	1.0519	0.3051	0.784992	Methylation	CRBLM
rs708723	1	204005889	cg09328024	T,C	0.5432	0.9662	-0.002	0.002	0.9666	0.3255	0.818249	Methylation	CRBLM
rs708723	1	204005889	cg07713493	T,C	0.5432	0.9662	0.004	0.004	0.9415	0.3319	0.818249	Methylation	CRBLM
rs708723	1	204005889	cg20530056	T,C	0.5432	0.9662	-0.006	0.006	0.8411	0.3591	0.836904	Methylation	CRBLM
rs708723	1	204005889	cg06376129	T,C	0.5432	0.9662	0	0	0.8117	0.3676	0.836904	Methylation	CRBLM
rs708723	1	204005889	cg08617916	T,C	0.5432	0.9662	0	0	0.7767	0.3782	0.836904	Methylation	CRBLM
rs708723	1	204005889	cg09635067	T,C	0.5432	0.9662	0.001	0.001	0.6843	0.4081	0.867069	Methylation	CRBLM
rs708723	1	204005889	cg23520347	T,C	0.5432	0.9662	-0.001	0.002	0.565	0.4522	0.895825	Methylation	CRBLM
rs708723	1	204005889	cg06948937	T,C	0.5432	0.9662	0.002	0.003	0.5622	0.4534	0.895825	Methylation	CRBLM
rs708723	1	204005889	cg10662787	T,C	0.5432	0.9662	0	0	0.5435	0.461	0.895825	Methylation	CRBLM
rs708723	1	204005889	cg23362667	T,C	0.5432	0.9662	-0.001	0.001	0.5332	0.4653	0.895825	Methylation	CRBLM
rs708723	1	204005889	cg01860753	T,C	0.5432	0.9662	-0.002	0.003	0.4824	0.4874	0.896941	Methylation	CRBLM
rs708723	1	204005889	cg24450312	T,C	0.5432	0.9662	-0.002	0.003	0.4138	0.52	0.905455	Methylation	CRBLM
rs708723	1	204005889	cg22857604	T,C	0.5432	0.9662	0.001	0.001	0.3947	0.5298	0.909592	Methylation	CRBLM
rs708723	1	204005889	cg21478222	T,C	0.5432	0.9662	0	0.001	0.154	0.6948	0.978352	Methylation	CRBLM
rs708723	1	204005889	cg18992688	T,C	0.5432	0.9662	0.001	0.003	0.1501	0.6984	0.978352	Methylation	CRBLM
rs708723	1	204005889	cg05369166	T,C	0.5432	0.9662	0	0.001	0.14	0.7083	0.978352	Methylation	CRBLM
rs708723	1	204005889	cg21478437	T,C	0.5432	0.9662	0	0.001	0.1356	0.7127	0.978352	Methylation	CRBLM
rs708723	1	204005889	cg22577136	T,C	0.5432	0.9662	0	0.001	0.1157	0.7338	0.978352	Methylation	CRBLM
rs708723	1	204005889	cg03958426	T,C	0.5432	0.9662	0	0.002	0.1026	0.7487	0.978352	Methylation	CRBLM
rs708723	1	204005889	cg04457794	T,C	0.5432	0.9662	0.001	0.002	0.0981	0.7542	0.978352	Methylation	CRBLM
rs708723	1	204005889	cg04633513	T,C	0.5432	0.9662	0	0.001	0.0958	0.7569	0.978352	Methylation	CRBLM
rs708723	1	204005889	cg17558126	T,C	0.5432	0.9662	0.001	0.004	0.0844	0.7715	0.978352	Methylation	CRBLM
rs708723	1	204005889	cg05290904	T,C	0.5432	0.9662	0	0.001	0.0631	0.8016	0.978352	Methylation	CRBLM
rs708723	1	204005889	cg13791589	T,C	0.5432	0.9662	0	0.001	0.0582	0.8094	0.978352	Methylation	CRBLM
rs708723	1	204005889	cg11455040	T,C	0.5432	0.9662	0	0.002	0.0473	0.8278	0.984357	Methylation	CRBLM
rs708723	1	204005889	cg11480873	T,C	0.5432	0.9662	0	0.001	0.0366	0.8483	0.984357	Methylation	CRBLM
rs708723	1	204005889	cg22571530	T,C	0.5432	0.9662	0	0.001	0.0191	0.89	0.986081	Methylation	CRBLM
rs708723	1	204005889	cg26245202	T,C	0.5432	0.9662	-0.001	0.009	0.0093	0.9232	0.986081	Methylation	CRBLM
rs708723	1	204005889	cg14717946	T,C	0.5432	0.9662	0	0.002	0.0092	0.9235	0.986081	Methylation	CRBLM
rs708723	1	204005889	cg08353146	T,C	0.5432	0.9662	0	0.001	0.0071	0.9328	0.986081	Methylation	CRBLM
rs708723	1	204005889	cg10167296	T,C	0.5432	0.9662	0	0.001	0.0036	0.9523	0.986081	Methylation	CRBLM
rs708723	1	204005889	cg15364537	T,C	0.5432	0.9662	0	0.002	0.0034	0.9533	0.986081	Methylation	CRBLM
rs708723	1	204005889	cg03732545	T,C	0.5432	0.9662	0	0.002	0.0004	0.9842	0.9863	Methylation	CRBLM
rs708723	1	204005889	cg14893161	T,C	0.5432	0.9662	-0.176	0.017	107.284	3.86e-25	9.61e-23	Methylation	FCTX
rs708723	1	204005889	cg14159672	T,C	0.5432	0.9662	-0.219	0.022	103.141	3.12e-24	3.88e-22	Methylation	FCTX
rs708723	1	204005889	cg09635067	T,C	0.5432	0.9662	0.003	0.001	6.6243	0.01006	0.278327	Methylation	FCTX
rs708723	1	204005889	cg14514226	T,C	0.5432	0.9662	0.002	0.001	5.4089	0.02003	0.454312	Methylation	FCTX
rs708723	1	204005889	cg08617916	T,C	0.5432	0.9662	0.001	0	2.929	0.087	0.85327	Methylation	FCTX
rs708723	1	204005889	cg13791589	T,C	0.5432	0.9662	0.001	0.001	2.6869	0.1012	0.85327	Methylation	FCTX
rs708723	1	204005889	cg08353146	T,C	0.5432	0.9662	0.003	0.002	2.3228	0.1275	0.85327	Methylation	FCTX
rs708723	1	204005889	cg26245202	T,C	0.5432	0.9662	0.013	0.009	2.2677	0.1321	0.85327	Methylation	FCTX
rs708723	1	204005889	cg10662787	T,C	0.5432	0.9662	0.001	0.001	2.1555	0.1421	0.85327	Methylation	FCTX
rs708723	1	204005889	cg01860753	T,C	0.5432	0.9662	0.007	0.005	2.0186	0.1554	0.85327	Methylation	FCTX
rs708723	1	204005889	cg22577136	T,C	0.5432	0.9662	0.002	0.001	1.9554	0.162	0.85327	Methylation	FCTX
rs708723	1	204005889	cg20530056	T,C	0.5432	0.9662	0.009	0.007	1.8967	0.1684	0.85327	Methylation	FCTX
rs708723	1	204005889	cg07713493	T,C	0.5432	0.9662	0.009	0.006	1.8291	0.1762	0.85327	Methylation	FCTX
rs708723	1	204005889	cg19452316	T,C	0.5432	0.9662	0.002	0.001	1.8267	0.1765	0.85327	Methylation	FCTX
rs708723	1	204005889	cg22857604	T,C	0.5432	0.9662	0.001	0.001	1.7373	0.1875	0.85327	Methylation	FCTX
rs708723	1	204005889	cg05369166	T,C	0.5432	0.9662	0.001	0.001	1.0365	0.3086	0.888377	Methylation	FCTX
rs708723	1	204005889	cg04633513	T,C	0.5432	0.9662	0.001	0.001	0.9844	0.3211	0.888377	Methylation	FCTX
rs708723	1	204005889	cg23520347	T,C	0.5432	0.9662	-0.002	0.002	0.8954	0.344	0.888699	Methylation	FCTX
rs708723	1	204005889	cg10167296	T,C	0.5432	0.9662	0.001	0.001	0.7887	0.3745	0.907309	Methylation	FCTX
rs708723	1	204005889	cg23362667	T,C	0.5432	0.9662	0.001	0.001	0.7622	0.3826	0.907309	Methylation	FCTX
rs708723	1	204005889	cg22571530	T,C	0.5432	0.9662	-0.001	0.001	0.6782	0.4102	0.928544	Methylation	FCTX
rs708723	1	204005889	cg14717946	T,C	0.5432	0.9662	-0.002	0.003	0.5291	0.467	0.988634	Methylation	FCTX
rs708723	1	204005889	cg17558126	T,C	0.5432	0.9662	-0.004	0.006	0.5017	0.4787	0.988634	Methylation	FCTX
rs708723	1	204005889	cg24450312	T,C	0.5432	0.9662	-0.001	0.003	0.317	0.5734	0.988634	Methylation	FCTX
rs708723	1	204005889	cg11480873	T,C	0.5432	0.9662	0	0.001	0.2798	0.5968	0.988634	Methylation	FCTX
rs708723	1	204005889	cg11560403	T,C	0.5432	0.9662	0	0.001	0.2385	0.6253	0.988634	Methylation	FCTX
rs708723	1	204005889	cg06376129	T,C	0.5432	0.9662	0	0	0.2159	0.6422	0.988634	Methylation	FCTX
rs708723	1	204005889	cg03732545	T,C	0.5432	0.9662	0.001	0.003	0.1711	0.6792	0.988634	Methylation	FCTX
rs708723	1	204005889	cg05938725	T,C	0.5432	0.9662	0	0.001	0.1691	0.6809	0.988634	Methylation	FCTX
rs708723	1	204005889	cg09328024	T,C	0.5432	0.9662	0.001	0.002	0.1585	0.6906	0.988634	Methylation	FCTX
rs708723	1	204005889	cg11455040	T,C	0.5432	0.9662	0.001	0.002	0.1109	0.7392	0.988634	Methylation	FCTX
rs708723	1	204005889	cg16639185	T,C	0.5432	0.9662	0.002	0.005	0.1102	0.7399	0.988634	Methylation	FCTX
rs708723	1	204005889	cg05290904	T,C	0.5432	0.9662	0	0.001	0.1017	0.7498	0.988634	Methylation	FCTX
rs708723	1	204005889	cg17860158	T,C	0.5432	0.9662	-0.001	0.003	0.0597	0.8069	0.988634	Methylation	FCTX
rs708723	1	204005889	cg03958426	T,C	0.5432	0.9662	0	0.002	0.0509	0.8215	0.988634	Methylation	FCTX
rs708723	1	204005889	cg15364537	T,C	0.5432	0.9662	0	0.002	0.045	0.8319	0.988634	Methylation	FCTX
rs708723	1	204005889	cg06948937	T,C	0.5432	0.9662	0	0.002	0.0406	0.8403	0.988634	Methylation	FCTX
rs708723	1	204005889	cg21478222	T,C	0.5432	0.9662	0	0.001	0.0391	0.8433	0.988634	Methylation	FCTX
rs708723	1	204005889	cg18992688	T,C	0.5432	0.9662	-0.001	0.004	0.0283	0.8664	0.988634	Methylation	FCTX
rs708723	1	204005889	cg02589695	T,C	0.5432	0.9662	0	0.003	0.0209	0.8851	0.988634	Methylation	FCTX
rs708723	1	204005889	cg04457794	T,C	0.5432	0.9662	0	0.002	0.0134	0.9079	0.988634	Methylation	FCTX
rs708723	1	204005889	cg21478437	T,C	0.5432	0.9662	0	0.002	0.0045	0.9462	0.988634	Methylation	FCTX
rs34016896	3	162475558	ILMN_1856480	C,T	0.6951	0.9883	-0.048	0.019	6.3318	0.01186	0.128977	Expression	CRBLM
rs34016896	3	162475558	ILMN_1664756	C,T	0.6951	0.9883	0.009	0.017	0.2928	0.5885	0.848464	Expression	CRBLM
rs34016896	3	162475558	ILMN_2232430	C,T	0.6951	0.9883	-0.005	0.028	0.0336	0.8546	0.951059	Expression	CRBLM
rs34016896	3	162475558	ILMN_1856480	C,T	0.6951	0.9883	-0.023	0.026	0.7674	0.381	0.769636	Expression	FCTX
rs34016896	3	162475558	ILMN_2232430	C,T	0.6951	0.9883	0.012	0.021	0.3184	0.5726	0.952163	Expression	FCTX
rs34016896	3	162475558	ILMN_1664756	C,T	0.6951	0.9883	0.006	0.017	0.1227	0.7261	0.98347	Expression	FCTX
rs34016896	3	162475558	cg04691961	C,T	0.7061	0.9971	-0.048	0.009	30.6844	3.04e-08	2.52e-06	Methylation	CRBLM
rs34016896	3	162475558	cg18919097	C,T	0.7061	0.9971	-0.005	0.002	12.5178	0.0004031	0.0200744	Methylation	CRBLM
rs34016896	3	162475558	cg17135325	C,T	0.7061	0.9971	-0.003	0.001	10.2134	0.001394	0.0542109	Methylation	CRBLM
rs34016896	3	162475558	cg18996776	C,T	0.7061	0.9971	-0.003	0.001	7.9852	0.004716	0.130476	Methylation	CRBLM
rs34016896	3	162475558	cg22668533	C,T	0.7061	0.9971	-0.001	0.001	4.8032	0.02841	0.442131	Methylation	CRBLM
rs34016896	3	162475558	cg16978263	C,T	0.7061	0.9971	-0.002	0.001	3.5805	0.05846	0.601431	Methylation	CRBLM
rs34016896	3	162475558	cg25635352	C,T	0.7061	0.9971	-0.001	0.001	3.4618	0.0628	0.601431	Methylation	CRBLM
rs34016896	3	162475558	cg23704082	C,T	0.7061	0.9971	0.001	0.001	2.7596	0.09667	0.670711	Methylation	CRBLM
rs34016896	3	162475558	cg12716838	C,T	0.7061	0.9971	-0.001	0	2.6496	0.1036	0.670711	Methylation	CRBLM
rs34016896	3	162475558	cg16334519	C,T	0.7061	0.9971	-0.007	0.005	1.8916	0.169	0.765109	Methylation	CRBLM
rs34016896	3	162475558	cg21508214	C,T	0.7061	0.9971	-0.001	0.001	1.7956	0.1803	0.774905	Methylation	CRBLM
rs34016896	3	162475558	cg10273210	C,T	0.7061	0.9971	-0.001	0.001	1.496	0.2213	0.784992	Methylation	CRBLM
rs34016896	3	162475558	cg24147596	C,T	0.7061	0.9971	0.004	0.003	1.4746	0.2246	0.784992	Methylation	CRBLM
rs34016896	3	162475558	cg09171381	C,T	0.7061	0.9971	-0.003	0.004	0.6194	0.4313	0.887551	Methylation	CRBLM
rs34016896	3	162475558	cg24494008	C,T	0.7061	0.9971	0	0.002	0.0011	0.9739	0.9863	Methylation	CRBLM
rs34016896	3	162475558	cg18919097	C,T	0.7061	0.9971	-0.011	0.002	22.2077	2.45e-06	0.00012201	Methylation	FCTX
rs34016896	3	162475558	cg24494008	C,T	0.7061	0.9971	0.003	0.002	3.2224	0.07264	0.85327	Methylation	FCTX
rs34016896	3	162475558	cg09171381	C,T	0.7061	0.9971	-0.007	0.004	2.6571	0.1031	0.85327	Methylation	FCTX
rs34016896	3	162475558	cg17135325	C,T	0.7061	0.9971	-0.002	0.001	2.301	0.1293	0.85327	Methylation	FCTX
rs34016896	3	162475558	cg04691961	C,T	0.7061	0.9971	-0.009	0.007	1.5225	0.2172	0.888377	Methylation	FCTX
rs34016896	3	162475558	cg21508214	C,T	0.7061	0.9971	-0.001	0	1.3519	0.2449	0.888377	Methylation	FCTX
rs34016896	3	162475558	cg23704082	C,T	0.7061	0.9971	-0.001	0.001	1.3454	0.2461	0.888377	Methylation	FCTX
rs34016896	3	162475558	cg16334519	C,T	0.7061	0.9971	-0.005	0.005	1	0.3173	0.888377	Methylation	FCTX
rs34016896	3	162475558	cg24147596	C,T	0.7061	0.9971	0.001	0.003	0.165	0.6846	0.988634	Methylation	FCTX
rs34016896	3	162475558	cg12716838	C,T	0.7061	0.9971	0	0.001	0.0201	0.8872	0.988634	Methylation	FCTX
rs34016896	3	162475558	cg16978263	C,T	0.7061	0.9971	0	0.001	0.0172	0.8958	0.988634	Methylation	FCTX
rs34016896	3	162475558	cg10273210	C,T	0.7061	0.9971	0	0.001	0.0104	0.9186	0.988634	Methylation	FCTX
rs34016896	3	162475558	cg22668533	C,T	0.7061	0.9971	0	0.001	0.0102	0.9195	0.988634	Methylation	FCTX
rs34016896	3	162475558	cg18996776	C,T	0.7061	0.9971	0	0.001	0.0086	0.9262	0.988634	Methylation	FCTX
rs34016896	3	162475558	cg25635352	C,T	0.7061	0.9971	0	0.002	0.0012	0.9729	0.9914	Methylation	FCTX
rs6812193	4	77418010	ILMN_1685540	T,C	0.3939	0.9999	0.061	0.034	3.207	0.07332	0.348356	Expression	CRBLM
rs6812193	4	77418010	ILMN_1693218	T,C	0.3939	0.9999	0.078	0.049	2.5028	0.1136	0.371844	Expression	CRBLM
rs6812193	4	77418010	ILMN_1788778	T,C	0.3939	0.9999	0.032	0.024	1.7743	0.1828	0.436603	Expression	CRBLM
rs6812193	4	77418010	ILMN_2061405	T,C	0.3939	0.9999	0.03	0.023	1.7124	0.1907	0.436603	Expression	CRBLM
rs6812193	4	77418010	ILMN_2391512	T,C	0.3939	0.9999	-0.014	0.016	0.8021	0.3705	0.657827	Expression	CRBLM
rs6812193	4	77418010	ILMN_1691942	T,C	0.3939	0.9999	0.012	0.015	0.6225	0.4301	0.71959	Expression	CRBLM
rs6812193	4	77418010	ILMN_2381758	T,C	0.3939	0.9999	0.024	0.045	0.2963	0.5862	0.848464	Expression	CRBLM
rs6812193	4	77418010	ILMN_1692121	T,C	0.3939	0.9999	0.011	0.027	0.1678	0.6821	0.890087	Expression	CRBLM
rs6812193	4	77418010	ILMN_1735360	T,C	0.3939	0.9999	-0.006	0.017	0.123	0.7258	0.9048	Expression	CRBLM
rs6812193	4	77418010	ILMN_2381753	T,C	0.3939	0.9999	0.008	0.034	0.0572	0.811	0.94076	Expression	CRBLM
rs6812193	4	77418010	ILMN_1814726	T,C	0.3939	0.9999	0.003	0.015	0.0424	0.8369	0.951059	Expression	CRBLM
rs6812193	4	77418010	ILMN_1856533	T,C	0.3939	0.9999	0.004	0.019	0.0394	0.8426	0.951059	Expression	CRBLM
rs6812193	4	77418010	ILMN_1720422	T,C	0.3939	0.9999	0.005	0.04	0.0192	0.8898	0.951059	Expression	CRBLM
rs6812193	4	77418010	ILMN_1668605	T,C	0.3939	0.9999	0.001	0.014	0.0069	0.9336	0.957607	Expression	CRBLM
rs6812193	4	77418010	ILMN_2391512	T,C	0.3939	0.9999	-0.026	0.015	3.0273	0.08188	0.41105	Expression	FCTX
rs6812193	4	77418010	ILMN_2381758	T,C	0.3939	0.9999	0.074	0.052	2.0364	0.1536	0.5576	Expression	FCTX
rs6812193	4	77418010	ILMN_1735360	T,C	0.3939	0.9999	-0.023	0.017	1.937	0.164	0.5576	Expression	FCTX
rs6812193	4	77418010	ILMN_2061405	T,C	0.3939	0.9999	0.024	0.017	1.8581	0.1728	0.564923	Expression	FCTX
rs6812193	4	77418010	ILMN_1720422	T,C	0.3939	0.9999	0.059	0.046	1.639	0.2005	0.587672	Expression	FCTX
rs6812193	4	77418010	ILMN_2381753	T,C	0.3939	0.9999	0.044	0.04	1.162	0.2811	0.7225	Expression	FCTX
rs6812193	4	77418010	ILMN_1691942	T,C	0.3939	0.9999	0.017	0.016	1.1242	0.289	0.7225	Expression	FCTX
rs6812193	4	77418010	ILMN_1692121	T,C	0.3939	0.9999	0.023	0.023	1.0751	0.2998	0.728086	Expression	FCTX
rs6812193	4	77418010	ILMN_1668605	T,C	0.3939	0.9999	-0.011	0.012	0.814	0.367	0.769636	Expression	FCTX
rs6812193	4	77418010	ILMN_1814726	T,C	0.3939	0.9999	0.012	0.019	0.4005	0.5269	0.952163	Expression	FCTX
rs6812193	4	77418010	ILMN_1693218	T,C	0.3939	0.9999	0.019	0.033	0.3287	0.5665	0.952163	Expression	FCTX
rs6812193	4	77418010	ILMN_1788778	T,C	0.3939	0.9999	-0.008	0.024	0.096	0.7566	0.98347	Expression	FCTX
rs6812193	4	77418010	ILMN_1856533	T,C	0.3939	0.9999	0.002	0.021	0.006	0.9383	0.98347	Expression	FCTX
rs6812193	4	77418010	ILMN_1685540	T,C	0.3939	0.9999	-0.002	0.026	0.0034	0.9535	0.98347	Expression	FCTX
rs6812193	4	77418010	cg17010112	T,C	0.3954	0.9999	-0.005	0.002	5.783	0.01618	0.335735	Methylation	CRBLM
rs6812193	4	77418010	cg27417997	T,C	0.3954	0.9999	-0.015	0.007	5.4749	0.01929	0.369478	Methylation	CRBLM
rs6812193	4	77418010	cg19740969	T,C	0.3954	0.9999	-0.005	0.003	2.3651	0.1241	0.670711	Methylation	CRBLM
rs6812193	4	77418010	cg01288089	T,C	0.3954	0.9999	-0.007	0.005	1.924	0.1654	0.762678	Methylation	CRBLM
rs6812193	4	77418010	cg24432073	T,C	0.3954	0.9999	-0.001	0.001	1.6395	0.2004	0.784992	Methylation	CRBLM
rs6812193	4	77418010	cg22960952	T,C	0.3954	0.9999	0.004	0.003	1.5404	0.2146	0.784992	Methylation	CRBLM
rs6812193	4	77418010	cg11659747	T,C	0.3954	0.9999	0.001	0.001	1.3889	0.2386	0.784992	Methylation	CRBLM
rs6812193	4	77418010	cg05409601	T,C	0.3954	0.9999	0.001	0.001	1.2014	0.273	0.784992	Methylation	CRBLM
rs6812193	4	77418010	cg11631275	T,C	0.3954	0.9999	-0.003	0.003	0.9061	0.3412	0.828469	Methylation	CRBLM
rs6812193	4	77418010	cg00899086	T,C	0.3954	0.9999	-0.001	0.001	0.9002	0.3427	0.828469	Methylation	CRBLM
rs6812193	4	77418010	cg08046471	T,C	0.3954	0.9999	-0.004	0.004	0.8709	0.3507	0.83166	Methylation	CRBLM
rs6812193	4	77418010	cg14724265	T,C	0.3954	0.9999	0.002	0.003	0.7824	0.3764	0.836904	Methylation	CRBLM
rs6812193	4	77418010	cg25467043	T,C	0.3954	0.9999	-0.001	0.001	0.6961	0.4041	0.867069	Methylation	CRBLM
rs6812193	4	77418010	cg14988503	T,C	0.3954	0.9999	0	0.001	0.6763	0.4109	0.867069	Methylation	CRBLM
rs6812193	4	77418010	cg14898892	T,C	0.3954	0.9999	0.004	0.006	0.4624	0.4965	0.896941	Methylation	CRBLM
rs6812193	4	77418010	cg23408913	T,C	0.3954	0.9999	0	0	0.4341	0.51	0.901521	Methylation	CRBLM
rs6812193	4	77418010	cg22476251	T,C	0.3954	0.9999	-0.002	0.004	0.3351	0.5626	0.920047	Methylation	CRBLM
rs6812193	4	77418010	cg21656748	T,C	0.3954	0.9999	0	0	0.3293	0.5661	0.920047	Methylation	CRBLM
rs6812193	4	77418010	cg22606062	T,C	0.3954	0.9999	0	0.001	0.3003	0.5837	0.920047	Methylation	CRBLM
rs6812193	4	77418010	cg14178991	T,C	0.3954	0.9999	0.003	0.005	0.2969	0.5859	0.920047	Methylation	CRBLM
rs6812193	4	77418010	cg11356705	T,C	0.3954	0.9999	0	0.001	0.2321	0.63	0.959257	Methylation	CRBLM
rs6812193	4	77418010	cg09423836	T,C	0.3954	0.9999	0	0.001	0.2297	0.6318	0.959257	Methylation	CRBLM
rs6812193	4	77418010	cg20430816	T,C	0.3954	0.9999	0	0.001	0.0795	0.778	0.978352	Methylation	CRBLM
rs6812193	4	77418010	cg01331554	T,C	0.3954	0.9999	0	0.001	0.0664	0.7966	0.978352	Methylation	CRBLM
rs6812193	4	77418010	cg10737625	T,C	0.3954	0.9999	0	0.001	0.0657	0.7977	0.978352	Methylation	CRBLM
rs6812193	4	77418010	cg03201604	T,C	0.3954	0.9999	0	0.001	0.0654	0.7982	0.978352	Methylation	CRBLM
rs6812193	4	77418010	cg11489580	T,C	0.3954	0.9999	0	0.001	0.0418	0.8381	0.984357	Methylation	CRBLM
rs6812193	4	77418010	cg10409560	T,C	0.3954	0.9999	0	0.001	0.0272	0.869	0.986081	Methylation	CRBLM
rs6812193	4	77418010	cg22252999	T,C	0.3954	0.9999	-0.002	0.01	0.0265	0.8707	0.986081	Methylation	CRBLM
rs6812193	4	77418010	cg09087966	T,C	0.3954	0.9999	0	0	0.0195	0.889	0.986081	Methylation	CRBLM
rs6812193	4	77418010	cg10682057	T,C	0.3954	0.9999	0	0	0.0121	0.9124	0.986081	Methylation	CRBLM
rs6812193	4	77418010	cg21548788	T,C	0.3954	0.9999	0	0.001	0.0045	0.9465	0.986081	Methylation	CRBLM
rs6812193	4	77418010	cg17010112	T,C	0.3954	0.9999	-0.008	0.002	10.9358	0.0009432	0.0300418	Methylation	FCTX
rs6812193	4	77418010	cg11659747	T,C	0.3954	0.9999	0.003	0.001	5.4056	0.02007	0.454312	Methylation	FCTX
rs6812193	4	77418010	cg10409560	T,C	0.3954	0.9999	0.003	0.001	5.2135	0.02241	0.465008	Methylation	FCTX
rs6812193	4	77418010	cg14898892	T,C	0.3954	0.9999	0.011	0.007	2.957	0.08551	0.85327	Methylation	FCTX
rs6812193	4	77418010	cg01288089	T,C	0.3954	0.9999	0.013	0.008	2.6392	0.1043	0.85327	Methylation	FCTX
rs6812193	4	77418010	cg22476251	T,C	0.3954	0.9999	0.004	0.004	1.1143	0.2912	0.888377	Methylation	FCTX
rs6812193	4	77418010	cg10682057	T,C	0.3954	0.9999	0.001	0.001	0.9282	0.3353	0.888699	Methylation	FCTX
rs6812193	4	77418010	cg11356705	T,C	0.3954	0.9999	-0.001	0.001	0.8245	0.3639	0.906609	Methylation	FCTX
rs6812193	4	77418010	cg22960952	T,C	0.3954	0.9999	-0.003	0.003	0.8235	0.3641	0.906609	Methylation	FCTX
rs6812193	4	77418010	cg22252999	T,C	0.3954	0.9999	-0.005	0.006	0.7341	0.3915	0.919016	Methylation	FCTX
rs6812193	4	77418010	cg19740969	T,C	0.3954	0.9999	0.002	0.003	0.6452	0.4218	0.9462	Methylation	FCTX
rs6812193	4	77418010	cg20430816	T,C	0.3954	0.9999	-0.002	0.002	0.6234	0.4298	0.951929	Methylation	FCTX
rs6812193	4	77418010	cg23408913	T,C	0.3954	0.9999	0.001	0.001	0.5635	0.4528	0.98041	Methylation	FCTX
rs6812193	4	77418010	cg10737625	T,C	0.3954	0.9999	-0.001	0.001	0.3596	0.5487	0.988634	Methylation	FCTX
rs6812193	4	77418010	cg03201604	T,C	0.3954	0.9999	0	0.001	0.336	0.5621	0.988634	Methylation	FCTX
rs6812193	4	77418010	cg21548788	T,C	0.3954	0.9999	0	0.001	0.2876	0.5918	0.988634	Methylation	FCTX
rs6812193	4	77418010	cg14178991	T,C	0.3954	0.9999	0.002	0.004	0.1479	0.7005	0.988634	Methylation	FCTX
rs6812193	4	77418010	cg05409601	T,C	0.3954	0.9999	0	0.001	0.1466	0.7018	0.988634	Methylation	FCTX
rs6812193	4	77418010	cg27417997	T,C	0.3954	0.9999	-0.002	0.006	0.1322	0.7162	0.988634	Methylation	FCTX
rs6812193	4	77418010	cg22606062	T,C	0.3954	0.9999	0	0.001	0.1246	0.7241	0.988634	Methylation	FCTX
rs6812193	4	77418010	cg01331554	T,C	0.3954	0.9999	0	0.001	0.1209	0.7281	0.988634	Methylation	FCTX
rs6812193	4	77418010	cg14988503	T,C	0.3954	0.9999	0	0.001	0.1146	0.735	0.988634	Methylation	FCTX
rs6812193	4	77418010	cg08046471	T,C	0.3954	0.9999	0.001	0.004	0.1076	0.7429	0.988634	Methylation	FCTX
rs6812193	4	77418010	cg11489580	T,C	0.3954	0.9999	0	0.001	0.0677	0.7947	0.988634	Methylation	FCTX
rs6812193	4	77418010	cg11631275	T,C	0.3954	0.9999	0.001	0.002	0.0641	0.8001	0.988634	Methylation	FCTX
rs6812193	4	77418010	cg25467043	T,C	0.3954	0.9999	0	0.001	0.0593	0.8076	0.988634	Methylation	FCTX
rs6812193	4	77418010	cg09087966	T,C	0.3954	0.9999	0	0	0.0348	0.852	0.988634	Methylation	FCTX
rs6812193	4	77418010	cg24432073	T,C	0.3954	0.9999	0	0.001	0.0243	0.8762	0.988634	Methylation	FCTX
rs6812193	4	77418010	cg21656748	T,C	0.3954	0.9999	0	0	0.0201	0.8873	0.988634	Methylation	FCTX
rs6812193	4	77418010	cg00899086	T,C	0.3954	0.9999	0	0.002	0.017	0.8963	0.988634	Methylation	FCTX
rs6812193	4	77418010	cg14724265	T,C	0.3954	0.9999	0	0.003	0.0045	0.9464	0.988634	Methylation	FCTX
rs6812193	4	77418010	cg09423836	T,C	0.3954	0.9999	0	0.001	0.0016	0.9677	0.9914	Methylation	FCTX
rs156429	7	23272545	ILMN_2115154	T,C	0.6168	0.9578	-0.131	0.023	32.537	1.17e-08	1.02e-06	Expression	CRBLM
rs156429	7	23272545	ILMN_1789616	T,C	0.6168	0.9578	-0.133	0.025	28.3436	1.02e-07	3.74e-06	Expression	CRBLM
rs156429	7	23272545	ILMN_1760792	T,C	0.6168	0.9578	0.051	0.03	2.9787	0.08437	0.348356	Expression	CRBLM
rs156429	7	23272545	ILMN_1739798	T,C	0.6168	0.9578	0.042	0.025	2.909	0.08809	0.348356	Expression	CRBLM
rs156429	7	23272545	ILMN_1674069	T,C	0.6168	0.9578	-0.005	0.019	0.0839	0.7721	0.920174	Expression	CRBLM
rs156429	7	23272545	ILMN_1674458	T,C	0.6168	0.9578	-0.001	0.023	0.0011	0.9733	0.9733	Expression	CRBLM
rs156429	7	23272545	ILMN_2115154	T,C	0.6168	0.9578	-0.078	0.017	21.7732	3.07e-06	0.00010115	Expression	FCTX
rs156429	7	23272545	ILMN_1789616	T,C	0.6168	0.9578	-0.083	0.018	21.4853	3.57e-06	0.00010115	Expression	FCTX
rs156429	7	23272545	ILMN_1674458	T,C	0.6168	0.9578	-0.039	0.023	3.0207	0.08221	0.41105	Expression	FCTX
rs156429	7	23272545	ILMN_1739798	T,C	0.6168	0.9578	0.036	0.023	2.4486	0.1176	0.49381	Expression	FCTX
rs156429	7	23272545	ILMN_1674069	T,C	0.6168	0.9578	0.025	0.017	2.1975	0.1382	0.533955	Expression	FCTX
rs156429	7	23272545	ILMN_1760792	T,C	0.6168	0.9578	0.001	0.028	0.0019	0.9652	0.98347	Expression	FCTX
rs156429	7	23272545	cg17274742	T,C	0.602	0.936	0.015	0.003	22.4733	2.13e-06	0.000132593	Methylation	CRBLM
rs156429	7	23272545	cg14898779	T,C	0.602	0.936	0.003	0.002	4.4313	0.03529	0.488178	Methylation	CRBLM
rs156429	7	23272545	cg08707078	T,C	0.602	0.936	-0.003	0.002	3.318	0.06852	0.609339	Methylation	CRBLM
rs156429	7	23272545	cg24265806	T,C	0.602	0.936	-0.001	0.001	2.9065	0.08823	0.670711	Methylation	CRBLM
rs156429	7	23272545	cg03403539	T,C	0.602	0.936	-0.002	0.001	2.5495	0.1103	0.670711	Methylation	CRBLM
rs156429	7	23272545	cg19042950	T,C	0.602	0.936	-0.002	0.002	2.5092	0.1132	0.670711	Methylation	CRBLM
rs156429	7	23272545	cg01770232	T,C	0.602	0.936	0.007	0.004	2.2849	0.1306	0.67479	Methylation	CRBLM
rs156429	7	23272545	cg02480835	T,C	0.602	0.936	-0.002	0.001	1.9792	0.1595	0.749349	Methylation	CRBLM
rs156429	7	23272545	cg23859078	T,C	0.602	0.936	-0.001	0	1.6957	0.1928	0.784992	Methylation	CRBLM
rs156429	7	23272545	cg12266024	T,C	0.602	0.936	-0.001	0.001	1.3218	0.2503	0.784992	Methylation	CRBLM
rs156429	7	23272545	cg01758870	T,C	0.602	0.936	0.004	0.004	1.2604	0.2616	0.784992	Methylation	CRBLM
rs156429	7	23272545	cg06452064	T,C	0.602	0.936	-0.001	0.001	1.1819	0.277	0.784992	Methylation	CRBLM
rs156429	7	23272545	cg00288562	T,C	0.602	0.936	-0.001	0.001	1.1395	0.2858	0.784992	Methylation	CRBLM
rs156429	7	23272545	cg05501276	T,C	0.602	0.936	-0.001	0.001	1.0488	0.3058	0.784992	Methylation	CRBLM
rs156429	7	23272545	cg12100077	T,C	0.602	0.936	-0.001	0.001	0.7715	0.3798	0.836904	Methylation	CRBLM
rs156429	7	23272545	cg13679077	T,C	0.602	0.936	-0.003	0.004	0.6001	0.4385	0.88897	Methylation	CRBLM
rs156429	7	23272545	cg02860543	T,C	0.602	0.936	-0.001	0.002	0.4906	0.4837	0.896941	Methylation	CRBLM
rs156429	7	23272545	cg09234859	T,C	0.602	0.936	-0.001	0.001	0.4712	0.4924	0.896941	Methylation	CRBLM
rs156429	7	23272545	cg11783451	T,C	0.602	0.936	-0.001	0.001	0.4059	0.524	0.906083	Methylation	CRBLM
rs156429	7	23272545	cg15703690	T,C	0.602	0.936	0.001	0.001	0.202	0.6531	0.965059	Methylation	CRBLM
rs156429	7	23272545	cg01182585	T,C	0.602	0.936	0	0.001	0.1659	0.6838	0.978352	Methylation	CRBLM
rs156429	7	23272545	cg25612145	T,C	0.602	0.936	0	0.001	0.0813	0.7756	0.978352	Methylation	CRBLM
rs156429	7	23272545	cg19747852	T,C	0.602	0.936	0	0.002	0.0373	0.8468	0.984357	Methylation	CRBLM
rs156429	7	23272545	cg22932819	T,C	0.602	0.936	0	0.001	0.0345	0.8526	0.984357	Methylation	CRBLM
rs156429	7	23272545	cg25635316	T,C	0.602	0.936	0	0.002	0.0239	0.877	0.986081	Methylation	CRBLM
rs156429	7	23272545	cg04108240	T,C	0.602	0.936	0	0.003	0.0052	0.9425	0.986081	Methylation	CRBLM
rs156429	7	23272545	cg26716323	T,C	0.602	0.936	0	0.001	0.0005	0.9829	0.9863	Methylation	CRBLM
rs156429	7	23272545	cg22932819	T,C	0.602	0.936	0.009	0.002	27.5209	1.55e-07	1.29e-05	Methylation	FCTX
rs156429	7	23272545	cg17274742	T,C	0.602	0.936	0.027	0.005	25.2305	5.09e-07	3.17e-05	Methylation	FCTX
rs156429	7	23272545	cg26716323	T,C	0.602	0.936	-0.001	0.001	2.5635	0.1094	0.85327	Methylation	FCTX
rs156429	7	23272545	cg02860543	T,C	0.602	0.936	-0.003	0.002	1.2379	0.2659	0.888377	Methylation	FCTX
rs156429	7	23272545	cg15703690	T,C	0.602	0.936	-0.003	0.003	1.088	0.2969	0.888377	Methylation	FCTX
rs156429	7	23272545	cg03403539	T,C	0.602	0.936	0.001	0.001	1.0014	0.317	0.888377	Methylation	FCTX
rs156429	7	23272545	cg01182585	T,C	0.602	0.936	0.001	0.001	0.9343	0.3338	0.888699	Methylation	FCTX
rs156429	7	23272545	cg24265806	T,C	0.602	0.936	0.001	0.001	0.6175	0.432	0.951929	Methylation	FCTX
rs156429	7	23272545	cg12100077	T,C	0.602	0.936	0	0	0.509	0.4756	0.988634	Methylation	FCTX
rs156429	7	23272545	cg01758870	T,C	0.602	0.936	-0.003	0.004	0.4761	0.4902	0.988634	Methylation	FCTX
rs156429	7	23272545	cg13679077	T,C	0.602	0.936	-0.001	0.002	0.4677	0.4941	0.988634	Methylation	FCTX
rs156429	7	23272545	cg00288562	T,C	0.602	0.936	-0.001	0.002	0.425	0.5145	0.988634	Methylation	FCTX
rs156429	7	23272545	cg19747852	T,C	0.602	0.936	0.001	0.002	0.4208	0.5165	0.988634	Methylation	FCTX
rs156429	7	23272545	cg01770232	T,C	0.602	0.936	0.002	0.004	0.3944	0.53	0.988634	Methylation	FCTX
rs156429	7	23272545	cg02480835	T,C	0.602	0.936	-0.001	0.001	0.3672	0.5445	0.988634	Methylation	FCTX
rs156429	7	23272545	cg04108240	T,C	0.602	0.936	-0.001	0.003	0.2944	0.5874	0.988634	Methylation	FCTX
rs156429	7	23272545	cg19042950	T,C	0.602	0.936	-0.001	0.002	0.2792	0.5972	0.988634	Methylation	FCTX
rs156429	7	23272545	cg12266024	T,C	0.602	0.936	-0.001	0.001	0.1974	0.6568	0.988634	Methylation	FCTX
rs156429	7	23272545	cg08707078	T,C	0.602	0.936	0.001	0.001	0.1299	0.7185	0.988634	Methylation	FCTX
rs156429	7	23272545	cg25635316	T,C	0.602	0.936	0.001	0.003	0.1127	0.7371	0.988634	Methylation	FCTX
rs156429	7	23272545	cg09234859	T,C	0.602	0.936	0	0.001	0.0898	0.7644	0.988634	Methylation	FCTX
rs156429	7	23272545	cg23859078	T,C	0.602	0.936	0	0	0.0764	0.7823	0.988634	Methylation	FCTX
rs156429	7	23272545	cg11783451	T,C	0.602	0.936	0	0.001	0.0507	0.8218	0.988634	Methylation	FCTX
rs156429	7	23272545	cg05501276	T,C	0.602	0.936	0	0.001	0.0176	0.8945	0.988634	Methylation	FCTX
rs156429	7	23272545	cg06452064	T,C	0.602	0.936	0	0.002	0.0083	0.9273	0.988634	Methylation	FCTX
rs156429	7	23272545	cg14898779	T,C	0.602	0.936	0	0.002	0.0068	0.9342	0.988634	Methylation	FCTX
rs156429	7	23272545	cg25612145	T,C	0.602	0.936	0	0.001	0.0041	0.9491	0.988634	Methylation	FCTX
rs591323	8	16741462	ILMN_2161832	G,A	0.7305	0.9795	-0.046	0.024	3.5931	0.05802	0.336516	Expression	CRBLM
rs591323	8	16741462	ILMN_1787658	G,A	0.7305	0.9795	0.024	0.02	1.4033	0.2362	0.486188	Expression	CRBLM
rs591323	8	16741462	ILMN_1715886	G,A	0.7305	0.9795	0.03	0.032	0.9014	0.3424	0.6206	Expression	CRBLM
rs591323	8	16741462	ILMN_1663648	G,A	0.7305	0.9795	-0.024	0.035	0.4776	0.4895	0.7743	Expression	CRBLM
rs591323	8	16741462	ILMN_1685044	G,A	0.7305	0.9795	-0.024	0.038	0.4069	0.5235	0.813295	Expression	CRBLM
rs591323	8	16741462	ILMN_1656134	G,A	0.7305	0.9795	-0.014	0.023	0.3618	0.5475	0.82125	Expression	CRBLM
rs591323	8	16741462	ILMN_2346727	G,A	0.7305	0.9795	0.013	0.038	0.1115	0.7384	0.9048	Expression	CRBLM
rs591323	8	16741462	ILMN_1787658	G,A	0.7305	0.9795	0.064	0.025	6.7607	0.009319	0.0990144	Expression	FCTX
rs591323	8	16741462	ILMN_1656134	G,A	0.7305	0.9795	-0.047	0.02	5.4169	0.01994	0.16949	Expression	FCTX
rs591323	8	16741462	ILMN_1781400	G,A	0.7305	0.9795	0.063	0.048	1.6884	0.1938	0.587672	Expression	FCTX
rs591323	8	16741462	ILMN_2161832	G,A	0.7305	0.9795	0.011	0.022	0.2532	0.6148	0.964055	Expression	FCTX
rs591323	8	16741462	ILMN_1663648	G,A	0.7305	0.9795	-0.01	0.048	0.0394	0.8426	0.98347	Expression	FCTX
rs591323	8	16741462	ILMN_1715886	G,A	0.7305	0.9795	-0.006	0.031	0.0371	0.8473	0.98347	Expression	FCTX
rs591323	8	16741462	ILMN_2346727	G,A	0.7305	0.9795	-0.002	0.042	0.0033	0.9545	0.98347	Expression	FCTX
rs591323	8	16741462	cg17509872	G,A	0.727	0.9549	-0.004	0.001	10.0491	0.001524	0.0542109	Methylation	CRBLM
rs591323	8	16741462	cg26831415	G,A	0.727	0.9549	-0.001	0	3.9369	0.04724	0.534671	Methylation	CRBLM
rs591323	8	16741462	cg06093279	G,A	0.727	0.9549	-0.001	0.001	3.1779	0.07464	0.640874	Methylation	CRBLM
rs591323	8	16741462	cg00825031	G,A	0.727	0.9549	-0.001	0	2.9317	0.08686	0.670711	Methylation	CRBLM
rs591323	8	16741462	cg14605021	G,A	0.727	0.9549	-0.002	0.001	2.3859	0.1224	0.670711	Methylation	CRBLM
rs591323	8	16741462	cg22807551	G,A	0.727	0.9549	-0.001	0.001	2.1596	0.1417	0.686665	Methylation	CRBLM
rs591323	8	16741462	cg24030449	G,A	0.727	0.9549	-0.002	0.001	1.7933	0.1805	0.774905	Methylation	CRBLM
rs591323	8	16741462	cg16303562	G,A	0.727	0.9549	0.005	0.004	1.6577	0.1979	0.784992	Methylation	CRBLM
rs591323	8	16741462	cg02786378	G,A	0.727	0.9549	-0.002	0.003	0.3597	0.5487	0.909592	Methylation	CRBLM
rs591323	8	16741462	cg01668126	G,A	0.727	0.9549	0.001	0.002	0.2301	0.6315	0.959257	Methylation	CRBLM
rs591323	8	16741462	cg03919781	G,A	0.727	0.9549	-0.001	0.002	0.1997	0.655	0.965059	Methylation	CRBLM
rs591323	8	16741462	cg13243377	G,A	0.727	0.9549	0	0.001	0.1292	0.7193	0.978352	Methylation	CRBLM
rs591323	8	16741462	cg04681849	G,A	0.727	0.9549	0	0.001	0.0916	0.7622	0.978352	Methylation	CRBLM
rs591323	8	16741462	cg10160407	G,A	0.727	0.9549	0	0.001	0.0344	0.8529	0.984357	Methylation	CRBLM
rs591323	8	16741462	cg24030449	G,A	0.727	0.9549	0.003	0.002	1.5002	0.2206	0.888377	Methylation	FCTX
rs591323	8	16741462	cg26831415	G,A	0.727	0.9549	0.001	0	1.2488	0.2638	0.888377	Methylation	FCTX
rs591323	8	16741462	cg14605021	G,A	0.727	0.9549	0.003	0.002	1.2042	0.2725	0.888377	Methylation	FCTX
rs591323	8	16741462	cg10160407	G,A	0.727	0.9549	0	0	1.188	0.2757	0.888377	Methylation	FCTX
rs591323	8	16741462	cg13243377	G,A	0.727	0.9549	0.001	0.001	0.9126	0.3394	0.888699	Methylation	FCTX
rs591323	8	16741462	cg17509872	G,A	0.727	0.9549	0.002	0.002	0.8556	0.355	0.90199	Methylation	FCTX
rs591323	8	16741462	cg16303562	G,A	0.727	0.9549	-0.003	0.003	0.7132	0.3984	0.919016	Methylation	FCTX
rs591323	8	16741462	cg00825031	G,A	0.727	0.9549	0	0.001	0.4106	0.5217	0.988634	Methylation	FCTX
rs591323	8	16741462	cg06093279	G,A	0.727	0.9549	-0.001	0.001	0.3404	0.5596	0.988634	Methylation	FCTX
rs591323	8	16741462	cg03919781	G,A	0.727	0.9549	-0.001	0.002	0.3328	0.564	0.988634	Methylation	FCTX
rs591323	8	16741462	cg22807551	G,A	0.727	0.9549	-0.001	0.002	0.2296	0.6318	0.988634	Methylation	FCTX
rs591323	8	16741462	cg01668126	G,A	0.727	0.9549	0	0.002	0.0092	0.9237	0.988634	Methylation	FCTX
rs591323	8	16741462	cg02786378	G,A	0.727	0.9549	0	0.004	0.0013	0.9717	0.9914	Methylation	FCTX
rs591323	8	16741462	cg04681849	G,A	0.727	0.9549	0	0.002	0.0002	0.9875	0.9914	Methylation	FCTX
rs4889603	16	30889726	ILMN_1739236	G,A	0.4046	0.8281	-0.075	0.02	14.6302	0.0001308	0.00227592	Expression	CRBLM
rs4889603	16	30889726	ILMN_2371147	G,A	0.4046	0.8281	-0.066	0.022	9.061	0.002611	0.0378595	Expression	CRBLM
rs4889603	16	30889726	ILMN_1693394	G,A	0.4046	0.8281	-0.072	0.028	6.5235	0.01065	0.128977	Expression	CRBLM
rs4889603	16	30889726	ILMN_1667260	G,A	0.4046	0.8281	-0.061	0.025	5.9651	0.01459	0.13833	Expression	CRBLM
rs4889603	16	30889726	ILMN_1737644	G,A	0.4046	0.8281	-0.071	0.03	5.8143	0.0159	0.13833	Expression	CRBLM
rs4889603	16	30889726	ILMN_1736577	G,A	0.4046	0.8281	-0.046	0.02	5.3534	0.02068	0.16356	Expression	CRBLM
rs4889603	16	30889726	ILMN_1701487	G,A	0.4046	0.8281	-0.077	0.034	5.105	0.02386	0.167575	Expression	CRBLM
rs4889603	16	30889726	ILMN_1741148	G,A	0.4046	0.8281	-0.047	0.021	5.0209	0.02504	0.167575	Expression	CRBLM
rs4889603	16	30889726	ILMN_2125747	G,A	0.4046	0.8281	-0.041	0.02	4.0279	0.04475	0.278089	Expression	CRBLM
rs4889603	16	30889726	ILMN_1724406	G,A	0.4046	0.8281	-0.038	0.021	3.2224	0.07264	0.348356	Expression	CRBLM
rs4889603	16	30889726	ILMN_2402341	G,A	0.4046	0.8281	-0.044	0.025	3.0641	0.08004	0.348356	Expression	CRBLM
rs4889603	16	30889726	ILMN_1815283	G,A	0.4046	0.8281	-0.043	0.027	2.5071	0.1133	0.371844	Expression	CRBLM
rs4889603	16	30889726	ILMN_1680313	G,A	0.4046	0.8281	-0.041	0.026	2.4781	0.1154	0.371844	Expression	CRBLM
rs4889603	16	30889726	ILMN_1656420	G,A	0.4046	0.8281	-0.046	0.032	2.0946	0.1478	0.436603	Expression	CRBLM
rs4889603	16	30889726	ILMN_2336130	G,A	0.4046	0.8281	-0.039	0.028	1.9459	0.163	0.436603	Expression	CRBLM
rs4889603	16	30889726	ILMN_1808712	G,A	0.4046	0.8281	-0.031	0.022	1.9167	0.1662	0.436603	Expression	CRBLM
rs4889603	16	30889726	ILMN_1782377	G,A	0.4046	0.8281	0.03	0.022	1.8574	0.1729	0.436603	Expression	CRBLM
rs4889603	16	30889726	ILMN_1659343	G,A	0.4046	0.8281	-0.04	0.03	1.8545	0.1733	0.436603	Expression	CRBLM
rs4889603	16	30889726	ILMN_1782633	G,A	0.4046	0.8281	-0.038	0.028	1.8128	0.1782	0.436603	Expression	CRBLM
rs4889603	16	30889726	ILMN_1796244	G,A	0.4046	0.8281	-0.036	0.027	1.7631	0.1842	0.436603	Expression	CRBLM
rs4889603	16	30889726	ILMN_1655498	G,A	0.4046	0.8281	-0.033	0.025	1.6372	0.2007	0.447715	Expression	CRBLM
rs4889603	16	30889726	ILMN_1685289	G,A	0.4046	0.8281	-0.023	0.02	1.3446	0.2462	0.486805	Expression	CRBLM
rs4889603	16	30889726	ILMN_1739946	G,A	0.4046	0.8281	-0.024	0.023	1.0749	0.2998	0.567013	Expression	CRBLM
rs4889603	16	30889726	ILMN_1669607	G,A	0.4046	0.8281	-0.016	0.019	0.7668	0.3812	0.663288	Expression	CRBLM
rs4889603	16	30889726	ILMN_1707804	G,A	0.4046	0.8281	-0.018	0.021	0.7182	0.3967	0.676724	Expression	CRBLM
rs4889603	16	30889726	ILMN_1713749	G,A	0.4046	0.8281	-0.015	0.021	0.5303	0.4665	0.765764	Expression	CRBLM
rs4889603	16	30889726	ILMN_1668639	G,A	0.4046	0.8281	-0.015	0.021	0.4949	0.4817	0.7743	Expression	CRBLM
rs4889603	16	30889726	ILMN_1804679	G,A	0.4046	0.8281	0.012	0.02	0.377	0.5392	0.82125	Expression	CRBLM
rs4889603	16	30889726	ILMN_1791147	G,A	0.4046	0.8281	-0.012	0.023	0.2828	0.5949	0.848464	Expression	CRBLM
rs4889603	16	30889726	ILMN_1714327	G,A	0.4046	0.8281	-0.014	0.029	0.2398	0.6243	0.876034	Expression	CRBLM
rs4889603	16	30889726	ILMN_2070052	G,A	0.4046	0.8281	0.018	0.038	0.2255	0.6349	0.876767	Expression	CRBLM
rs4889603	16	30889726	ILMN_2306066	G,A	0.4046	0.8281	-0.009	0.02	0.2091	0.6475	0.880195	Expression	CRBLM
rs4889603	16	30889726	ILMN_1745329	G,A	0.4046	0.8281	-0.009	0.022	0.1874	0.6651	0.890087	Expression	CRBLM
rs4889603	16	30889726	ILMN_2133187	G,A	0.4046	0.8281	0.01	0.024	0.1584	0.6906	0.890087	Expression	CRBLM
rs4889603	16	30889726	ILMN_1812477	G,A	0.4046	0.8281	-0.011	0.029	0.153	0.6957	0.890087	Expression	CRBLM
rs4889603	16	30889726	ILMN_1763129	G,A	0.4046	0.8281	-0.007	0.024	0.094	0.7592	0.917367	Expression	CRBLM
rs4889603	16	30889726	ILMN_1698766	G,A	0.4046	0.8281	-0.007	0.025	0.0742	0.7853	0.923258	Expression	CRBLM
rs4889603	16	30889726	ILMN_1696843	G,A	0.4046	0.8281	-0.005	0.031	0.026	0.8718	0.951059	Expression	CRBLM
rs4889603	16	30889726	ILMN_1736700	G,A	0.4046	0.8281	0.007	0.045	0.0226	0.8806	0.951059	Expression	CRBLM
rs4889603	16	30889726	ILMN_1759008	G,A	0.4046	0.8281	0.002	0.016	0.017	0.8964	0.951059	Expression	CRBLM
rs4889603	16	30889726	ILMN_1768311	G,A	0.4046	0.8281	-0.002	0.026	0.0069	0.934	0.957607	Expression	CRBLM
rs4889603	16	30889726	ILMN_2208802	G,A	0.4046	0.8281	0.003	0.035	0.0064	0.9364	0.957607	Expression	CRBLM
rs4889603	16	30889726	ILMN_1678037	G,A	0.4046	0.8281	-0.001	0.022	0.0045	0.9466	0.957607	Expression	CRBLM
rs4889603	16	30889726	ILMN_1739236	G,A	0.4046	0.8281	-0.062	0.015	16.8255	4.1e-05	0.00087125	Expression	FCTX
rs4889603	16	30889726	ILMN_1804679	G,A	0.4046	0.8281	0.053	0.018	8.586	0.003388	0.0479967	Expression	FCTX
rs4889603	16	30889726	ILMN_2179726	G,A	0.4046	0.8281	-0.082	0.031	6.8712	0.00876	0.0990144	Expression	FCTX
rs4889603	16	30889726	ILMN_2125747	G,A	0.4046	0.8281	-0.054	0.024	4.9782	0.02567	0.1972	Expression	FCTX
rs4889603	16	30889726	ILMN_1782377	G,A	0.4046	0.8281	-0.05	0.023	4.7887	0.02865	0.1972	Expression	FCTX
rs4889603	16	30889726	ILMN_1713749	G,A	0.4046	0.8281	-0.061	0.028	4.7001	0.03016	0.1972	Expression	FCTX
rs4889603	16	30889726	ILMN_2402341	G,A	0.4046	0.8281	-0.038	0.021	3.2131	0.07305	0.41105	Expression	FCTX
rs4889603	16	30889726	ILMN_1669607	G,A	0.4046	0.8281	0.031	0.018	3.1288	0.07692	0.41105	Expression	FCTX
rs4889603	16	30889726	ILMN_1739946	G,A	0.4046	0.8281	-0.04	0.023	2.8817	0.08959	0.423064	Expression	FCTX
rs4889603	16	30889726	ILMN_1680313	G,A	0.4046	0.8281	-0.033	0.021	2.392	0.122	0.49381	Expression	FCTX
rs4889603	16	30889726	ILMN_1791147	G,A	0.4046	0.8281	0.028	0.02	1.9791	0.1595	0.5576	Expression	FCTX
rs4889603	16	30889726	ILMN_2371147	G,A	0.4046	0.8281	-0.032	0.025	1.6398	0.2004	0.587672	Expression	FCTX
rs4889603	16	30889726	ILMN_1667260	G,A	0.4046	0.8281	-0.026	0.022	1.4548	0.2278	0.624613	Expression	FCTX
rs4889603	16	30889726	ILMN_2298511	G,A	0.4046	0.8281	0.032	0.028	1.3213	0.2504	0.665125	Expression	FCTX
rs4889603	16	30889726	ILMN_2306066	G,A	0.4046	0.8281	-0.017	0.018	0.9815	0.3218	0.759806	Expression	FCTX
rs4889603	16	30889726	ILMN_1782633	G,A	0.4046	0.8281	-0.023	0.024	0.9118	0.3396	0.769636	Expression	FCTX
rs4889603	16	30889726	ILMN_1763129	G,A	0.4046	0.8281	-0.022	0.026	0.7284	0.3934	0.769636	Expression	FCTX
rs4889603	16	30889726	ILMN_2208802	G,A	0.4046	0.8281	0.017	0.028	0.336	0.5621	0.952163	Expression	FCTX
rs4889603	16	30889726	ILMN_1668639	G,A	0.4046	0.8281	0.011	0.02	0.3214	0.5708	0.952163	Expression	FCTX
rs4889603	16	30889726	ILMN_1678037	G,A	0.4046	0.8281	0.014	0.024	0.312	0.5764	0.952163	Expression	FCTX
rs4889603	16	30889726	ILMN_1759008	G,A	0.4046	0.8281	0.009	0.016	0.3022	0.5825	0.952163	Expression	FCTX
rs4889603	16	30889726	ILMN_1659343	G,A	0.4046	0.8281	-0.011	0.026	0.1821	0.6696	0.98347	Expression	FCTX
rs4889603	16	30889726	ILMN_1655498	G,A	0.4046	0.8281	0.016	0.038	0.1765	0.6744	0.98347	Expression	FCTX
rs4889603	16	30889726	ILMN_1737644	G,A	0.4046	0.8281	-0.01	0.03	0.1035	0.7477	0.98347	Expression	FCTX
rs4889603	16	30889726	ILMN_1812477	G,A	0.4046	0.8281	0.014	0.045	0.1013	0.7503	0.98347	Expression	FCTX
rs4889603	16	30889726	ILMN_1724406	G,A	0.4046	0.8281	0.006	0.02	0.0848	0.7709	0.98347	Expression	FCTX
rs4889603	16	30889726	ILMN_2336130	G,A	0.4046	0.8281	0.008	0.026	0.0838	0.7722	0.98347	Expression	FCTX
rs4889603	16	30889726	ILMN_1736700	G,A	0.4046	0.8281	0.018	0.061	0.0835	0.7726	0.98347	Expression	FCTX
rs4889603	16	30889726	ILMN_1696843	G,A	0.4046	0.8281	0.009	0.032	0.0743	0.7852	0.98347	Expression	FCTX
rs4889603	16	30889726	ILMN_1707804	G,A	0.4046	0.8281	0.005	0.02	0.0738	0.7859	0.98347	Expression	FCTX
rs4889603	16	30889726	ILMN_1741148	G,A	0.4046	0.8281	0.008	0.03	0.0727	0.7874	0.98347	Expression	FCTX
rs4889603	16	30889726	ILMN_1701487	G,A	0.4046	0.8281	0.007	0.029	0.0638	0.8005	0.98347	Expression	FCTX
rs4889603	16	30889726	ILMN_1736577	G,A	0.4046	0.8281	-0.005	0.019	0.0615	0.8042	0.98347	Expression	FCTX
rs4889603	16	30889726	ILMN_1796244	G,A	0.4046	0.8281	-0.005	0.021	0.057	0.8113	0.98347	Expression	FCTX
rs4889603	16	30889726	ILMN_1693394	G,A	0.4046	0.8281	-0.003	0.018	0.0308	0.8606	0.98347	Expression	FCTX
rs4889603	16	30889726	ILMN_2070052	G,A	0.4046	0.8281	0.006	0.043	0.0202	0.887	0.98347	Expression	FCTX
rs4889603	16	30889726	ILMN_1768311	G,A	0.4046	0.8281	-0.003	0.027	0.0165	0.8977	0.98347	Expression	FCTX
rs4889603	16	30889726	ILMN_1810680	G,A	0.4046	0.8281	-0.003	0.022	0.0151	0.9021	0.98347	Expression	FCTX
rs4889603	16	30889726	ILMN_1745329	G,A	0.4046	0.8281	-0.003	0.023	0.0129	0.9095	0.98347	Expression	FCTX
rs4889603	16	30889726	ILMN_1656420	G,A	0.4046	0.8281	0.002	0.023	0.0091	0.924	0.98347	Expression	FCTX
rs4889603	16	30889726	ILMN_1685289	G,A	0.4046	0.8281	0.002	0.02	0.0063	0.9367	0.98347	Expression	FCTX
rs4889603	16	30889726	ILMN_1714327	G,A	0.4046	0.8281	0.001	0.023	0.0012	0.9719	0.98347	Expression	FCTX
rs4889603	16	30889726	ILMN_1808712	G,A	0.4046	0.8281	0	0.018	0.0001	0.992	0.992	Expression	FCTX
rs4889603	16	30889726	cg13439730	G,A	0.4112	0.8606	0.021	0.007	8.3758	0.003803	0.118368	Methylation	CRBLM
rs4889603	16	30889726	cg11970458	G,A	0.4112	0.8606	-0.006	0.002	7.3741	0.006617	0.149785	Methylation	CRBLM
rs4889603	16	30889726	cg25549413	G,A	0.4112	0.8606	0.017	0.008	4.8433	0.02775	0.442131	Methylation	CRBLM
rs4889603	16	30889726	cg11884546	G,A	0.4112	0.8606	0.01	0.005	4.5457	0.033	0.483353	Methylation	CRBLM
rs4889603	16	30889726	cg03627896	G,A	0.4112	0.8606	0.019	0.009	4.1197	0.04239	0.521003	Methylation	CRBLM
rs4889603	16	30889726	cg12582366	G,A	0.4112	0.8606	0.019	0.009	4.0648	0.04379	0.521003	Methylation	CRBLM
rs4889603	16	30889726	cg09438266	G,A	0.4112	0.8606	-0.001	0	4.0588	0.04394	0.521003	Methylation	CRBLM
rs4889603	16	30889726	cg13150441	G,A	0.4112	0.8606	0.002	0.001	3.5569	0.0593	0.601431	Methylation	CRBLM
rs4889603	16	30889726	cg19464252	G,A	0.4112	0.8606	-0.007	0.004	3.4684	0.06255	0.601431	Methylation	CRBLM
rs4889603	16	30889726	cg08860143	G,A	0.4112	0.8606	-0.009	0.005	3.3983	0.06526	0.601842	Methylation	CRBLM
rs4889603	16	30889726	cg02733650	G,A	0.4112	0.8606	-0.002	0.001	3.003	0.08311	0.670711	Methylation	CRBLM
rs4889603	16	30889726	cg06030619	G,A	0.4112	0.8606	0.001	0.001	2.5932	0.1073	0.670711	Methylation	CRBLM
rs4889603	16	30889726	cg17794261	G,A	0.4112	0.8606	-0.001	0	2.5808	0.1082	0.670711	Methylation	CRBLM
rs4889603	16	30889726	cg03297731	G,A	0.4112	0.8606	-0.009	0.006	2.488	0.1147	0.670711	Methylation	CRBLM
rs4889603	16	30889726	cg05313261	G,A	0.4112	0.8606	-0.005	0.003	2.4426	0.1181	0.670711	Methylation	CRBLM
rs4889603	16	30889726	cg15337006	G,A	0.4112	0.8606	0.004	0.003	2.4245	0.1195	0.670711	Methylation	CRBLM
rs4889603	16	30889726	cg26233914	G,A	0.4112	0.8606	0.01	0.007	2.4103	0.1205	0.670711	Methylation	CRBLM
rs4889603	16	30889726	cg24115627	G,A	0.4112	0.8606	-0.004	0.002	2.3487	0.1254	0.670711	Methylation	CRBLM
rs4889603	16	30889726	cg19819891	G,A	0.4112	0.8606	-0.001	0.001	2.3387	0.1262	0.670711	Methylation	CRBLM
rs4889603	16	30889726	cg22609068	G,A	0.4112	0.8606	0.001	0.001	2.3332	0.1266	0.670711	Methylation	CRBLM
rs4889603	16	30889726	cg16152813	G,A	0.4112	0.8606	-0.002	0.001	2.231	0.1353	0.67479	Methylation	CRBLM
rs4889603	16	30889726	cg15928446	G,A	0.4112	0.8606	-0.001	0.001	2.2279	0.1355	0.67479	Methylation	CRBLM
rs4889603	16	30889726	cg24110063	G,A	0.4112	0.8606	-0.007	0.005	2.1408	0.1434	0.686665	Methylation	CRBLM
rs4889603	16	30889726	cg18427589	G,A	0.4112	0.8606	-0.001	0.001	1.8281	0.1764	0.774905	Methylation	CRBLM
rs4889603	16	30889726	cg10976172	G,A	0.4112	0.8606	0.001	0.001	1.7274	0.1887	0.784992	Methylation	CRBLM
rs4889603	16	30889726	cg13277179	G,A	0.4112	0.8606	0.001	0.001	1.6203	0.2031	0.784992	Methylation	CRBLM
rs4889603	16	30889726	cg04368877	G,A	0.4112	0.8606	0.001	0.001	1.5972	0.2063	0.784992	Methylation	CRBLM
rs4889603	16	30889726	cg14671453	G,A	0.4112	0.8606	-0.001	0.001	1.5617	0.2114	0.784992	Methylation	CRBLM
rs4889603	16	30889726	cg03920233	G,A	0.4112	0.8606	-0.001	0.001	1.5539	0.2126	0.784992	Methylation	CRBLM
rs4889603	16	30889726	cg21742836	G,A	0.4112	0.8606	-0.004	0.003	1.5218	0.2173	0.784992	Methylation	CRBLM
rs4889603	16	30889726	cg07842593	G,A	0.4112	0.8606	0.002	0.002	1.4247	0.2326	0.784992	Methylation	CRBLM
rs4889603	16	30889726	cg10526232	G,A	0.4112	0.8606	-0.003	0.002	1.393	0.2379	0.784992	Methylation	CRBLM
rs4889603	16	30889726	cg22827290	G,A	0.4112	0.8606	-0.001	0	1.378	0.2404	0.784992	Methylation	CRBLM
rs4889603	16	30889726	cg26706070	G,A	0.4112	0.8606	-0.001	0.001	1.3656	0.2426	0.784992	Methylation	CRBLM
rs4889603	16	30889726	cg11141013	G,A	0.4112	0.8606	-0.001	0	1.2924	0.2556	0.784992	Methylation	CRBLM
rs4889603	16	30889726	cg10705951	G,A	0.4112	0.8606	-0.001	0	1.1952	0.2743	0.784992	Methylation	CRBLM
rs4889603	16	30889726	cg19981839	G,A	0.4112	0.8606	-0.002	0.002	1.1926	0.2748	0.784992	Methylation	CRBLM
rs4889603	16	30889726	cg19289461	G,A	0.4112	0.8606	-0.004	0.003	1.1776	0.2778	0.784992	Methylation	CRBLM
rs4889603	16	30889726	cg23910243	G,A	0.4112	0.8606	-0.013	0.012	1.1676	0.2799	0.784992	Methylation	CRBLM
rs4889603	16	30889726	cg14131445	G,A	0.4112	0.8606	0.001	0.001	1.1505	0.2835	0.784992	Methylation	CRBLM
rs4889603	16	30889726	cg11970301	G,A	0.4112	0.8606	-0.001	0.001	1.1362	0.2865	0.784992	Methylation	CRBLM
rs4889603	16	30889726	cg17022635	G,A	0.4112	0.8606	0	0	1.1092	0.2923	0.784992	Methylation	CRBLM
rs4889603	16	30889726	cg10917602	G,A	0.4112	0.8606	-0.005	0.005	1.0789	0.2989	0.784992	Methylation	CRBLM
rs4889603	16	30889726	cg00822607	G,A	0.4112	0.8606	-0.001	0.001	1.0665	0.3017	0.784992	Methylation	CRBLM
rs4889603	16	30889726	cg11919694	G,A	0.4112	0.8606	-0.001	0.001	1.0488	0.3058	0.784992	Methylation	CRBLM
rs4889603	16	30889726	cg23660191	G,A	0.4112	0.8606	-0.001	0.001	0.9882	0.3202	0.813569	Methylation	CRBLM
rs4889603	16	30889726	cg15970621	G,A	0.4112	0.8606	-0.001	0.001	0.9464	0.3306	0.818249	Methylation	CRBLM
rs4889603	16	30889726	cg13543096	G,A	0.4112	0.8606	0	0.001	0.8713	0.3506	0.83166	Methylation	CRBLM
rs4889603	16	30889726	cg02164442	G,A	0.4112	0.8606	-0.006	0.006	0.8095	0.3683	0.836904	Methylation	CRBLM
rs4889603	16	30889726	cg02008169	G,A	0.4112	0.8606	-0.001	0.001	0.7913	0.3737	0.836904	Methylation	CRBLM
rs4889603	16	30889726	cg05467106	G,A	0.4112	0.8606	0.001	0.002	0.7865	0.3752	0.836904	Methylation	CRBLM
rs4889603	16	30889726	cg03942436	G,A	0.4112	0.8606	-0.001	0.001	0.7423	0.3889	0.849439	Methylation	CRBLM
rs4889603	16	30889726	cg14387505	G,A	0.4112	0.8606	-0.005	0.006	0.7144	0.398	0.861757	Methylation	CRBLM
rs4889603	16	30889726	cg25033993	G,A	0.4112	0.8606	-0.002	0.002	0.6576	0.4174	0.873383	Methylation	CRBLM
rs4889603	16	30889726	cg27196129	G,A	0.4112	0.8606	0.001	0.001	0.6386	0.4242	0.880215	Methylation	CRBLM
rs4889603	16	30889726	cg15247144	G,A	0.4112	0.8606	0.001	0.001	0.5926	0.4414	0.88897	Methylation	CRBLM
rs4889603	16	30889726	cg25463428	G,A	0.4112	0.8606	0	0.001	0.5893	0.4427	0.88897	Methylation	CRBLM
rs4889603	16	30889726	cg22062239	G,A	0.4112	0.8606	0.001	0.001	0.5501	0.4583	0.895825	Methylation	CRBLM
rs4889603	16	30889726	cg26295990	G,A	0.4112	0.8606	0.001	0.001	0.5274	0.4677	0.895825	Methylation	CRBLM
rs4889603	16	30889726	cg19663795	G,A	0.4112	0.8606	0.002	0.003	0.4919	0.4831	0.896941	Methylation	CRBLM
rs4889603	16	30889726	cg26350691	G,A	0.4112	0.8606	-0.002	0.002	0.479	0.4889	0.896941	Methylation	CRBLM
rs4889603	16	30889726	cg15785580	G,A	0.4112	0.8606	0	0	0.4785	0.4891	0.896941	Methylation	CRBLM
rs4889603	16	30889726	cg13669583	G,A	0.4112	0.8606	0.004	0.006	0.4611	0.4971	0.896941	Methylation	CRBLM
rs4889603	16	30889726	cg09765256	G,A	0.4112	0.8606	0.001	0.002	0.4364	0.5088	0.901521	Methylation	CRBLM
rs4889603	16	30889726	cg02647545	G,A	0.4112	0.8606	0	0.001	0.433	0.5105	0.901521	Methylation	CRBLM
rs4889603	16	30889726	cg13974531	G,A	0.4112	0.8606	-0.002	0.003	0.4233	0.5153	0.903589	Methylation	CRBLM
rs4889603	16	30889726	cg03691812	G,A	0.4112	0.8606	0	0.001	0.3768	0.5393	0.909592	Methylation	CRBLM
rs4889603	16	30889726	cg10995380	G,A	0.4112	0.8606	-0.001	0.001	0.3702	0.5429	0.909592	Methylation	CRBLM
rs4889603	16	30889726	cg10665018	G,A	0.4112	0.8606	-0.001	0.002	0.3649	0.5458	0.909592	Methylation	CRBLM
rs4889603	16	30889726	cg19450025	G,A	0.4112	0.8606	0.002	0.003	0.3637	0.5465	0.909592	Methylation	CRBLM
rs4889603	16	30889726	cg13726463	G,A	0.4112	0.8606	-0.005	0.009	0.3544	0.5516	0.909592	Methylation	CRBLM
rs4889603	16	30889726	cg15468095	G,A	0.4112	0.8606	0.003	0.005	0.314	0.5752	0.920047	Methylation	CRBLM
rs4889603	16	30889726	cg15119375	G,A	0.4112	0.8606	0.001	0.001	0.3085	0.5786	0.920047	Methylation	CRBLM
rs4889603	16	30889726	cg14821083	G,A	0.4112	0.8606	0	0.001	0.303	0.582	0.920047	Methylation	CRBLM
rs4889603	16	30889726	cg17640201	G,A	0.4112	0.8606	0	0.001	0.2943	0.5875	0.920047	Methylation	CRBLM
rs4889603	16	30889726	cg17428423	G,A	0.4112	0.8606	-0.001	0.002	0.2831	0.5947	0.925502	Methylation	CRBLM
rs4889603	16	30889726	cg14370448	G,A	0.4112	0.8606	-0.002	0.004	0.248	0.6185	0.956562	Methylation	CRBLM
rs4889603	16	30889726	cg05361373	G,A	0.4112	0.8606	0.001	0.002	0.2215	0.6379	0.962649	Methylation	CRBLM
rs4889603	16	30889726	cg22377963	G,A	0.4112	0.8606	0.001	0.002	0.2054	0.6504	0.965059	Methylation	CRBLM
rs4889603	16	30889726	cg00256074	G,A	0.4112	0.8606	-0.001	0.003	0.203	0.6523	0.965059	Methylation	CRBLM
rs4889603	16	30889726	cg09938681	G,A	0.4112	0.8606	0	0.001	0.1893	0.6635	0.971832	Methylation	CRBLM
rs4889603	16	30889726	cg23353982	G,A	0.4112	0.8606	0	0	0.1801	0.6713	0.977507	Methylation	CRBLM
rs4889603	16	30889726	cg01171858	G,A	0.4112	0.8606	0.001	0.003	0.1523	0.6963	0.978352	Methylation	CRBLM
rs4889603	16	30889726	cg08395706	G,A	0.4112	0.8606	0	0.001	0.1244	0.7244	0.978352	Methylation	CRBLM
rs4889603	16	30889726	cg24243406	G,A	0.4112	0.8606	0	0.001	0.123	0.7258	0.978352	Methylation	CRBLM
rs4889603	16	30889726	cg10316764	G,A	0.4112	0.8606	-0.001	0.004	0.121	0.7279	0.978352	Methylation	CRBLM
rs4889603	16	30889726	cg02989940	G,A	0.4112	0.8606	0.002	0.004	0.1208	0.7282	0.978352	Methylation	CRBLM
rs4889603	16	30889726	cg27586455	G,A	0.4112	0.8606	0	0.001	0.1118	0.7381	0.978352	Methylation	CRBLM
rs4889603	16	30889726	cg14710524	G,A	0.4112	0.8606	0	0.001	0.1102	0.7399	0.978352	Methylation	CRBLM
rs4889603	16	30889726	cg15415545	G,A	0.4112	0.8606	0	0	0.1019	0.7495	0.978352	Methylation	CRBLM
rs4889603	16	30889726	cg23894003	G,A	0.4112	0.8606	-0.001	0.003	0.0931	0.7602	0.978352	Methylation	CRBLM
rs4889603	16	30889726	cg18160978	G,A	0.4112	0.8606	0	0.001	0.0897	0.7645	0.978352	Methylation	CRBLM
rs4889603	16	30889726	cg16014085	G,A	0.4112	0.8606	0.001	0.004	0.079	0.7787	0.978352	Methylation	CRBLM
rs4889603	16	30889726	cg08966293	G,A	0.4112	0.8606	0	0.001	0.0783	0.7796	0.978352	Methylation	CRBLM
rs4889603	16	30889726	cg13951948	G,A	0.4112	0.8606	0	0	0.0744	0.7851	0.978352	Methylation	CRBLM
rs4889603	16	30889726	cg00833777	G,A	0.4112	0.8606	0.002	0.007	0.0661	0.7971	0.978352	Methylation	CRBLM
rs4889603	16	30889726	cg07190917	G,A	0.4112	0.8606	0	0.001	0.0604	0.8059	0.978352	Methylation	CRBLM
rs4889603	16	30889726	cg09039698	G,A	0.4112	0.8606	0	0	0.0582	0.8094	0.978352	Methylation	CRBLM
rs4889603	16	30889726	cg04404982	G,A	0.4112	0.8606	0.001	0.003	0.0525	0.8187	0.984357	Methylation	CRBLM
rs4889603	16	30889726	cg26134665	G,A	0.4112	0.8606	0.002	0.007	0.0499	0.8232	0.984357	Methylation	CRBLM
rs4889603	16	30889726	cg07896225	G,A	0.4112	0.8606	0	0	0.0458	0.8306	0.984357	Methylation	CRBLM
rs4889603	16	30889726	cg13828871	G,A	0.4112	0.8606	0	0.001	0.0339	0.8539	0.984357	Methylation	CRBLM
rs4889603	16	30889726	cg19229809	G,A	0.4112	0.8606	0	0.002	0.0273	0.8687	0.986081	Methylation	CRBLM
rs4889603	16	30889726	cg22305782	G,A	0.4112	0.8606	0	0.001	0.0201	0.8872	0.986081	Methylation	CRBLM
rs4889603	16	30889726	cg17800442	G,A	0.4112	0.8606	0	0.003	0.0179	0.8935	0.986081	Methylation	CRBLM
rs4889603	16	30889726	cg07125009	G,A	0.4112	0.8606	0	0.001	0.013	0.9092	0.986081	Methylation	CRBLM
rs4889603	16	30889726	cg13473336	G,A	0.4112	0.8606	0	0.005	0.0101	0.9198	0.986081	Methylation	CRBLM
rs4889603	16	30889726	cg09587549	G,A	0.4112	0.8606	0	0.002	0.0098	0.9213	0.986081	Methylation	CRBLM
rs4889603	16	30889726	cg03309050	G,A	0.4112	0.8606	0	0.001	0.0071	0.9327	0.986081	Methylation	CRBLM
rs4889603	16	30889726	cg05116896	G,A	0.4112	0.8606	0	0.001	0.0068	0.9341	0.986081	Methylation	CRBLM
rs4889603	16	30889726	cg14176836	G,A	0.4112	0.8606	0	0.003	0.0067	0.9346	0.986081	Methylation	CRBLM
rs4889603	16	30889726	cg03766965	G,A	0.4112	0.8606	0	0.003	0.0059	0.9389	0.986081	Methylation	CRBLM
rs4889603	16	30889726	cg13271951	G,A	0.4112	0.8606	0.001	0.009	0.0044	0.9472	0.986081	Methylation	CRBLM
rs4889603	16	30889726	cg18278261	G,A	0.4112	0.8606	0	0	0.0033	0.9544	0.986081	Methylation	CRBLM
rs4889603	16	30889726	cg25047102	G,A	0.4112	0.8606	0	0.001	0.002	0.9639	0.9863	Methylation	CRBLM
rs4889603	16	30889726	cg01343729	G,A	0.4112	0.8606	0	0.001	0.0009	0.9756	0.9863	Methylation	CRBLM
rs4889603	16	30889726	cg12100791	G,A	0.4112	0.8606	0	0.011	0.0008	0.9769	0.9863	Methylation	CRBLM
rs4889603	16	30889726	cg08535091	G,A	0.4112	0.8606	0	0	0.0007	0.9791	0.9863	Methylation	CRBLM
rs4889603	16	30889726	cg14828965	G,A	0.4112	0.8606	0	0.001	0.0003	0.9863	0.9863	Methylation	CRBLM
rs4889603	16	30889726	cg25033993	G,A	0.4112	0.8606	-0.012	0.003	15.5146	8.19e-05	0.00339885	Methylation	FCTX
rs4889603	16	30889726	cg07896225	G,A	0.4112	0.8606	0.002	0.001	10.8931	0.0009652	0.0300418	Methylation	FCTX
rs4889603	16	30889726	cg09765256	G,A	0.4112	0.8606	0.001	0.001	4.415	0.03562	0.68226	Methylation	FCTX
rs4889603	16	30889726	cg19450025	G,A	0.4112	0.8606	-0.007	0.004	3.8986	0.04833	0.791197	Methylation	FCTX
rs4889603	16	30889726	cg10917602	G,A	0.4112	0.8606	-0.012	0.006	3.8491	0.04977	0.791197	Methylation	FCTX
rs4889603	16	30889726	cg13271951	G,A	0.4112	0.8606	-0.018	0.009	3.8137	0.05084	0.791197	Methylation	FCTX
rs4889603	16	30889726	cg26134665	G,A	0.4112	0.8606	-0.012	0.006	3.5438	0.05977	0.795358	Methylation	FCTX
rs4889603	16	30889726	cg05361373	G,A	0.4112	0.8606	0.009	0.005	3.5286	0.06032	0.795358	Methylation	FCTX
rs4889603	16	30889726	cg13669583	G,A	0.4112	0.8606	-0.01	0.005	3.5185	0.06069	0.795358	Methylation	FCTX
rs4889603	16	30889726	cg13726463	G,A	0.4112	0.8606	-0.014	0.008	3.1154	0.07756	0.85327	Methylation	FCTX
rs4889603	16	30889726	cg09587549	G,A	0.4112	0.8606	0.01	0.006	2.9826	0.08417	0.85327	Methylation	FCTX
rs4889603	16	30889726	cg15928446	G,A	0.4112	0.8606	0.001	0.001	2.8595	0.09083	0.85327	Methylation	FCTX
rs4889603	16	30889726	cg00833777	G,A	0.4112	0.8606	0.019	0.011	2.7983	0.09437	0.85327	Methylation	FCTX
rs4889603	16	30889726	cg26233914	G,A	0.4112	0.8606	0.007	0.004	2.7792	0.09549	0.85327	Methylation	FCTX
rs4889603	16	30889726	cg05467106	G,A	0.4112	0.8606	0.002	0.001	2.5222	0.1123	0.85327	Methylation	FCTX
rs4889603	16	30889726	cg03297731	G,A	0.4112	0.8606	-0.008	0.005	2.3626	0.1243	0.85327	Methylation	FCTX
rs4889603	16	30889726	cg10995380	G,A	0.4112	0.8606	0.003	0.002	2.3451	0.1257	0.85327	Methylation	FCTX
rs4889603	16	30889726	cg11970458	G,A	0.4112	0.8606	0.004	0.003	2.1438	0.1431	0.85327	Methylation	FCTX
rs4889603	16	30889726	cg22609068	G,A	0.4112	0.8606	0.002	0.001	2.0801	0.1492	0.85327	Methylation	FCTX
rs4889603	16	30889726	cg03691812	G,A	0.4112	0.8606	0.001	0.001	2.0346	0.1538	0.85327	Methylation	FCTX
rs4889603	16	30889726	cg03766965	G,A	0.4112	0.8606	-0.005	0.004	1.9527	0.1623	0.85327	Methylation	FCTX
rs4889603	16	30889726	cg25549413	G,A	0.4112	0.8606	0.013	0.009	1.9453	0.1631	0.85327	Methylation	FCTX
rs4889603	16	30889726	cg13473336	G,A	0.4112	0.8606	0.006	0.005	1.8922	0.169	0.85327	Methylation	FCTX
rs4889603	16	30889726	cg15247144	G,A	0.4112	0.8606	0.004	0.003	1.8626	0.1723	0.85327	Methylation	FCTX
rs4889603	16	30889726	cg23910243	G,A	0.4112	0.8606	-0.009	0.006	1.8114	0.1783	0.85327	Methylation	FCTX
rs4889603	16	30889726	cg13951948	G,A	0.4112	0.8606	0	0	1.792	0.1807	0.85327	Methylation	FCTX
rs4889603	16	30889726	cg04368877	G,A	0.4112	0.8606	-0.003	0.002	1.735	0.1878	0.85327	Methylation	FCTX
rs4889603	16	30889726	cg02164442	G,A	0.4112	0.8606	0.011	0.009	1.7094	0.1911	0.85327	Methylation	FCTX
rs4889603	16	30889726	cg09039698	G,A	0.4112	0.8606	0.001	0	1.7029	0.1919	0.85327	Methylation	FCTX
rs4889603	16	30889726	cg14821083	G,A	0.4112	0.8606	0.001	0.001	1.6725	0.1959	0.855774	Methylation	FCTX
rs4889603	16	30889726	cg23894003	G,A	0.4112	0.8606	-0.003	0.002	1.603	0.2055	0.882233	Methylation	FCTX
rs4889603	16	30889726	cg12582366	G,A	0.4112	0.8606	0.012	0.01	1.4938	0.2216	0.888377	Methylation	FCTX
rs4889603	16	30889726	cg18278261	G,A	0.4112	0.8606	0.001	0	1.4411	0.23	0.888377	Methylation	FCTX
rs4889603	16	30889726	cg21742836	G,A	0.4112	0.8606	-0.006	0.005	1.4102	0.235	0.888377	Methylation	FCTX
rs4889603	16	30889726	cg22377963	G,A	0.4112	0.8606	0.004	0.003	1.3267	0.2494	0.888377	Methylation	FCTX
rs4889603	16	30889726	cg26706070	G,A	0.4112	0.8606	0.001	0.001	1.3151	0.2515	0.888377	Methylation	FCTX
rs4889603	16	30889726	cg22827290	G,A	0.4112	0.8606	-0.001	0.001	1.3043	0.2534	0.888377	Methylation	FCTX
rs4889603	16	30889726	cg03627896	G,A	0.4112	0.8606	0.012	0.011	1.2854	0.2569	0.888377	Methylation	FCTX
rs4889603	16	30889726	cg14710524	G,A	0.4112	0.8606	0.001	0.001	1.2504	0.2635	0.888377	Methylation	FCTX
rs4889603	16	30889726	cg02989940	G,A	0.4112	0.8606	0.005	0.004	1.219	0.2696	0.888377	Methylation	FCTX
rs4889603	16	30889726	cg03920233	G,A	0.4112	0.8606	0.001	0.001	1.2138	0.2706	0.888377	Methylation	FCTX
rs4889603	16	30889726	cg14370448	G,A	0.4112	0.8606	0.005	0.005	1.1957	0.2742	0.888377	Methylation	FCTX
rs4889603	16	30889726	cg17800442	G,A	0.4112	0.8606	0.003	0.003	1.1139	0.2912	0.888377	Methylation	FCTX
rs4889603	16	30889726	cg13828871	G,A	0.4112	0.8606	0.002	0.001	1.0735	0.3002	0.888377	Methylation	FCTX
rs4889603	16	30889726	cg13439730	G,A	0.4112	0.8606	0.007	0.006	1.0637	0.3024	0.888377	Methylation	FCTX
rs4889603	16	30889726	cg23353982	G,A	0.4112	0.8606	0.001	0.001	1.0595	0.3033	0.888377	Methylation	FCTX
rs4889603	16	30889726	cg07842593	G,A	0.4112	0.8606	0.002	0.002	1.0595	0.3033	0.888377	Methylation	FCTX
rs4889603	16	30889726	cg16152813	G,A	0.4112	0.8606	-0.002	0.002	1.0168	0.3133	0.888377	Methylation	FCTX
rs4889603	16	30889726	cg19464252	G,A	0.4112	0.8606	0.005	0.005	0.9907	0.3196	0.888377	Methylation	FCTX
rs4889603	16	30889726	cg25047102	G,A	0.4112	0.8606	-0.001	0.001	0.9264	0.3358	0.888699	Methylation	FCTX
rs4889603	16	30889726	cg22305782	G,A	0.4112	0.8606	-0.003	0.003	0.9046	0.3416	0.888699	Methylation	FCTX
rs4889603	16	30889726	cg25463428	G,A	0.4112	0.8606	0.001	0.001	0.8873	0.3462	0.888699	Methylation	FCTX
rs4889603	16	30889726	cg13150441	G,A	0.4112	0.8606	0.001	0.001	0.7983	0.3716	0.907309	Methylation	FCTX
rs4889603	16	30889726	cg19819891	G,A	0.4112	0.8606	0.001	0.001	0.7761	0.3783	0.907309	Methylation	FCTX
rs4889603	16	30889726	cg15785580	G,A	0.4112	0.8606	0	0	0.7658	0.3815	0.907309	Methylation	FCTX
rs4889603	16	30889726	cg10665018	G,A	0.4112	0.8606	-0.002	0.002	0.7112	0.399	0.919016	Methylation	FCTX
rs4889603	16	30889726	cg06030619	G,A	0.4112	0.8606	0.001	0.001	0.7014	0.4023	0.919016	Methylation	FCTX
rs4889603	16	30889726	cg24110063	G,A	0.4112	0.8606	-0.004	0.005	0.5758	0.448	0.978526	Methylation	FCTX
rs4889603	16	30889726	cg24115627	G,A	0.4112	0.8606	-0.001	0.002	0.5023	0.4785	0.988634	Methylation	FCTX
rs4889603	16	30889726	cg10976172	G,A	0.4112	0.8606	0.001	0.001	0.4841	0.4866	0.988634	Methylation	FCTX
rs4889603	16	30889726	cg24243406	G,A	0.4112	0.8606	0	0.001	0.4646	0.4955	0.988634	Methylation	FCTX
rs4889603	16	30889726	cg09938681	G,A	0.4112	0.8606	0	0.001	0.4417	0.5063	0.988634	Methylation	FCTX
rs4889603	16	30889726	cg10705951	G,A	0.4112	0.8606	0	0	0.4234	0.5153	0.988634	Methylation	FCTX
rs4889603	16	30889726	cg26295990	G,A	0.4112	0.8606	-0.001	0.001	0.3987	0.5278	0.988634	Methylation	FCTX
rs4889603	16	30889726	cg27586455	G,A	0.4112	0.8606	0.001	0.002	0.3873	0.5337	0.988634	Methylation	FCTX
rs4889603	16	30889726	cg15970621	G,A	0.4112	0.8606	0	0.001	0.3802	0.5375	0.988634	Methylation	FCTX
rs4889603	16	30889726	cg17428423	G,A	0.4112	0.8606	0.001	0.001	0.3724	0.5417	0.988634	Methylation	FCTX
rs4889603	16	30889726	cg14176836	G,A	0.4112	0.8606	-0.002	0.004	0.3547	0.5515	0.988634	Methylation	FCTX
rs4889603	16	30889726	cg18160978	G,A	0.4112	0.8606	-0.001	0.001	0.353	0.5524	0.988634	Methylation	FCTX
rs4889603	16	30889726	cg02647545	G,A	0.4112	0.8606	0	0.001	0.3185	0.5725	0.988634	Methylation	FCTX
rs4889603	16	30889726	cg10526232	G,A	0.4112	0.8606	0.001	0.002	0.3139	0.5753	0.988634	Methylation	FCTX
rs4889603	16	30889726	cg13974531	G,A	0.4112	0.8606	0.002	0.004	0.2953	0.5869	0.988634	Methylation	FCTX
rs4889603	16	30889726	cg11884546	G,A	0.4112	0.8606	-0.002	0.004	0.2634	0.6078	0.988634	Methylation	FCTX
rs4889603	16	30889726	cg15337006	G,A	0.4112	0.8606	-0.002	0.003	0.2604	0.6099	0.988634	Methylation	FCTX
rs4889603	16	30889726	cg02733650	G,A	0.4112	0.8606	-0.001	0.002	0.2484	0.6182	0.988634	Methylation	FCTX
rs4889603	16	30889726	cg23660191	G,A	0.4112	0.8606	0	0.001	0.1953	0.6585	0.988634	Methylation	FCTX
rs4889603	16	30889726	cg27196129	G,A	0.4112	0.8606	0.001	0.001	0.1778	0.6733	0.988634	Methylation	FCTX
rs4889603	16	30889726	cg14387505	G,A	0.4112	0.8606	0.003	0.007	0.1572	0.6917	0.988634	Methylation	FCTX
rs4889603	16	30889726	cg26350691	G,A	0.4112	0.8606	0.001	0.003	0.1491	0.6994	0.988634	Methylation	FCTX
rs4889603	16	30889726	cg14828965	G,A	0.4112	0.8606	-0.001	0.001	0.1484	0.7001	0.988634	Methylation	FCTX
rs4889603	16	30889726	cg13277179	G,A	0.4112	0.8606	0	0.001	0.1416	0.7067	0.988634	Methylation	FCTX
rs4889603	16	30889726	cg11919694	G,A	0.4112	0.8606	0.001	0.001	0.1331	0.7153	0.988634	Methylation	FCTX
rs4889603	16	30889726	cg19981839	G,A	0.4112	0.8606	0.001	0.002	0.1301	0.7183	0.988634	Methylation	FCTX
rs4889603	16	30889726	cg22062239	G,A	0.4112	0.8606	0	0.001	0.1284	0.7201	0.988634	Methylation	FCTX
rs4889603	16	30889726	cg07125009	G,A	0.4112	0.8606	0	0.001	0.1256	0.7231	0.988634	Methylation	FCTX
rs4889603	16	30889726	cg09438266	G,A	0.4112	0.8606	0	0	0.1197	0.7294	0.988634	Methylation	FCTX
rs4889603	16	30889726	cg07190917	G,A	0.4112	0.8606	-0.001	0.002	0.1033	0.7479	0.988634	Methylation	FCTX
rs4889603	16	30889726	cg14131445	G,A	0.4112	0.8606	0	0.001	0.1004	0.7514	0.988634	Methylation	FCTX
rs4889603	16	30889726	cg10316764	G,A	0.4112	0.8606	0.001	0.004	0.0878	0.7669	0.988634	Methylation	FCTX
rs4889603	16	30889726	cg01343729	G,A	0.4112	0.8606	0	0.001	0.0862	0.7691	0.988634	Methylation	FCTX
rs4889603	16	30889726	cg08535091	G,A	0.4112	0.8606	0	0	0.0716	0.7889	0.988634	Methylation	FCTX
rs4889603	16	30889726	cg08395706	G,A	0.4112	0.8606	0	0.001	0.0665	0.7965	0.988634	Methylation	FCTX
rs4889603	16	30889726	cg15468095	G,A	0.4112	0.8606	0.002	0.006	0.0619	0.8035	0.988634	Methylation	FCTX
rs4889603	16	30889726	cg16014085	G,A	0.4112	0.8606	0.001	0.003	0.0494	0.8242	0.988634	Methylation	FCTX
rs4889603	16	30889726	cg08860143	G,A	0.4112	0.8606	-0.001	0.004	0.0371	0.8473	0.988634	Methylation	FCTX
rs4889603	16	30889726	cg12100791	G,A	0.4112	0.8606	-0.002	0.011	0.0326	0.8567	0.988634	Methylation	FCTX
rs4889603	16	30889726	cg01171858	G,A	0.4112	0.8606	-0.001	0.004	0.0314	0.8594	0.988634	Methylation	FCTX
rs4889603	16	30889726	cg05116896	G,A	0.4112	0.8606	0	0.001	0.0298	0.8629	0.988634	Methylation	FCTX
rs4889603	16	30889726	cg02008169	G,A	0.4112	0.8606	0	0.001	0.0288	0.8653	0.988634	Methylation	FCTX
rs4889603	16	30889726	cg19289461	G,A	0.4112	0.8606	-0.001	0.004	0.0198	0.888	0.988634	Methylation	FCTX
rs4889603	16	30889726	cg11970301	G,A	0.4112	0.8606	0	0.001	0.0188	0.8911	0.988634	Methylation	FCTX
rs4889603	16	30889726	cg03309050	G,A	0.4112	0.8606	0	0.001	0.0157	0.9004	0.988634	Methylation	FCTX
rs4889603	16	30889726	cg15119375	G,A	0.4112	0.8606	0	0.001	0.014	0.9057	0.988634	Methylation	FCTX
rs4889603	16	30889726	cg18427589	G,A	0.4112	0.8606	0	0.002	0.0133	0.9084	0.988634	Methylation	FCTX
rs4889603	16	30889726	cg05313261	G,A	0.4112	0.8606	0	0.002	0.0129	0.9096	0.988634	Methylation	FCTX
rs4889603	16	30889726	cg15415545	G,A	0.4112	0.8606	0	0.001	0.011	0.9164	0.988634	Methylation	FCTX
rs4889603	16	30889726	cg11141013	G,A	0.4112	0.8606	0	0.001	0.0108	0.917	0.988634	Methylation	FCTX
rs4889603	16	30889726	cg17640201	G,A	0.4112	0.8606	0	0.001	0.007	0.9335	0.988634	Methylation	FCTX
rs4889603	16	30889726	cg00822607	G,A	0.4112	0.8606	0	0.001	0.0069	0.9339	0.988634	Methylation	FCTX
rs4889603	16	30889726	cg04404982	G,A	0.4112	0.8606	0	0.003	0.0056	0.9401	0.988634	Methylation	FCTX
rs4889603	16	30889726	cg19229809	G,A	0.4112	0.8606	0	0.001	0.0048	0.9449	0.988634	Methylation	FCTX
rs4889603	16	30889726	cg14671453	G,A	0.4112	0.8606	0	0.002	0.0038	0.9509	0.988634	Methylation	FCTX
rs4889603	16	30889726	cg03942436	G,A	0.4112	0.8606	0	0.001	0.0036	0.952	0.988634	Methylation	FCTX
rs4889603	16	30889726	cg17022635	G,A	0.4112	0.8606	0	0.001	0.0035	0.9529	0.988634	Methylation	FCTX
rs4889603	16	30889726	cg19663795	G,A	0.4112	0.8606	0	0.004	0.0015	0.9693	0.9914	Methylation	FCTX
rs4889603	16	30889726	cg13543096	G,A	0.4112	0.8606	0	0.001	0.0006	0.9797	0.9914	Methylation	FCTX
rs4889603	16	30889726	cg00256074	G,A	0.4112	0.8606	0	0.004	0.0004	0.9833	0.9914	Methylation	FCTX
rs4889603	16	30889726	cg17794261	G,A	0.4112	0.8606	0	0.001	0.0003	0.9851	0.9914	Methylation	FCTX
rs4889603	16	30889726	cg08966293	G,A	0.4112	0.8606	0	0.001	0.0001	0.9914	0.9914	Methylation	FCTX
